# Supplementary material for: Identification of novel prophage regions in Xenorhabdus nematophila genome and gene expression analysis during phage-like particle induction
Source: PeerJ. 2022 Feb 15;10:e12956. doi: 10.7717/peerj.12956 (PMC8855722; doi:10.7717/peerj.12956)
Supplement: Supplemental Information 1 [file peerj-10-12956-s001.xlsx]

## Sheet: Sheet1
Targeted gene	Locus tag in LN681227 reference	Position in LN681227 reference	Primers name	Sequences	Efficiency	Annealing Temperature (C˚)	Concentration of Primers (uM)
gyrA	XNC2_2750	2,865,354-2,867,993	Xn_gyrAF	GCCAGAGAAATCACACCGGT	0.99	60	0.5
DNA gyrase subunit A			Xn_gyrAR	TTCATCGCGAAAAGTACGCG
recA	XNC2_1236	1,125,760-1,126,836	Xn_recAF	CAGCGCTTGGACAGATTGAGAA	0.9	60	0.4
DNA recombination protein			Xn_recAR	CAATACGGCCCATTGGCAAAC
lexA	XNC2_3790	3,798,615-3,799,232	Xn_lexA_F	GAAATTGCCGCGCGTCTTGG	0.81	60	0.3
DNA binding domain			Xn_lexA_R	GCAGCAACACGACCAATTAACGGT
CI repressor (xnp1)	XNC2_1159	1,052,684-1,053,274	Xn_Phage_CI_repr_F1	TGGGGGAAGACCCGCTATTG	0.9	60	0.4
			Xn_Phage_CI_repr_R2	CACTGGATGATCCAATCCGC
GpA (xnp1)	XNC2_1161	1,053,955-1,055,898	Xn_Phage_GPA_F	CGGGAATGGCTGGAACAAA	0.85	60	0.4
Replication gene A protein			Xn_Phage_GPA_R	AAACCACGCATTCTGACCAT
GpW (xnp1)	XNC2_1168	1,058,593-1,058,943	Xn_phage_GpW_R	TCACCGGAATAGAAAGTGAA	0.83	60	0.4
Baseplate assembly protein W			Xn_phage_GpW_F	TACCGCAATTAGCCGTTGGG
major head subunit (xnp3)	XNC2_3258	3,300,810-3,301,733	Xn_phage_Mu_major_head_F	CCCATTTCGGTAAACAGCG	0.8	60	0.4
			Xn_phage_Mu_major_head_R	TGGATTGGTGACCGCGTCAT
CI repressor (xnp3)	XNC2_3229	3,283,952-3,284,566	Xn_phage_Mu_CI_F	TCTCCCCTGATAGATTCCAA	0.99	60	0.3
			Xn_phage_Mu_CI_R	GTGAGACTAGGTCTTGGTG
phage tail fiber (xnp4)	XNC2_1933	1,882,458-1,883,207	Xn_phage_T4_tail_fiber_R	GAATATCTGCCCCGTTCTTG	0.8	60	0.4
			Xn_phage_T4_tail_fiber_F	ATTTCCTCCAGAACATGGAT
major head capsid (xnp2)	XNC2_2961	3,043,341-3,044,450	Xn_phage_P2_major_head_F	GCCATTTGCTCGGTATTGGGC	0.95	63	0.4
			Xn_phage_P2_major_head_R	GGCGGCGATTTCCATAACCTG
