# Supplementary material for: Identification of novel prophage regions in Xenorhabdus nematophila genome and gene expression analysis during phage-like particle induction
Source: PeerJ. 2022 Feb 15;10:e12956. doi: 10.7717/peerj.12956 (PMC8855722; doi:10.7717/peerj.12956)
Supplement: Supplemental Information 2 [file peerj-10-12956-s002.xlsx]

## Sheet: Sheet1
Table SX. Detection of potential prophages regions in the genome of Xenorhabdus nematophila strain AN6/1 (NZ_LN681227)
Region	Region Length	Completeness	Score	# Total Proteins	Region Position	Most Common Phage	GC %
1	7.6Kb	questionable	70	9	117546-125204	Stenotrophomonas phage vB_SmaS_DLP_5 (NC_042082); Delepquintavirus	0.3903
2	25Kb	incomplete	50	15	167167-192166	Escherichia phage RCS47 (NC_042128); Punavirus	0.428
3	34Kb	intact	150	38	1051218-1085234	Salmonella phage RE-2010 (NC_019488); Felsduovirus	0.4087
4	14.9Kb	incomplete	50	8	1860982-1875922	Pseudomonas phage F116 (NC_006552); Hollowayvirus	0.3984
5	40.6Kb	intact	150	29	1860349-1900996	Stx2-converting phage 1717 (NC_011357); Pankowvirus	0.4378
6	6.5Kb	incomplete	50	8	1976044-1982567	Clostridium phage c-st (NC_007581); Siphoviridae	0.4338
7	7.4Kb	incomplete	60	11	2288188-2295589	Stx2-converting phage 1717 (NC_011357); Pankowvirus	0.4885
8	8.8Kb	questionable	90	10	2320507-2329376	Burkholderia phage ST79 (NC_021343); Nampongvirus	0.4595
9	37.9Kb	intact	150	54	3025064-3063058	Salmonella phage RE-2010 (NC_019488); Felsduovirus	0.4997
10	67.4Kb	intact	150	85	3282364-3349766	Escherichia phage D108 (NC_013594); Muvirus	0.4973
11	16.3Kb	questionable	70	19	3816028-3832426	Salmonella phage ST64B (NC_004313); Myoviridae	0.4403
12	15.4Kb	questionable	80	15	3965395-3980875	Salmonella phage ST64B (NC_004313); Myoviridae	0.4599
13	20.5Kb	questionable	70	19	3980929-4001455	Aeromonas phage phiO18P (NC_009542); Bielevirus	0.4244
