# Supplementary material for: Identification of novel prophage regions in Xenorhabdus nematophila genome and gene expression analysis during phage-like particle induction
Source: PeerJ. 2022 Feb 15;10:e12956. doi: 10.7717/peerj.12956 (PMC8855722; doi:10.7717/peerj.12956)
Supplement: Supplemental Information 3 [file peerj-10-12956-s003.xlsx]

## Sheet: Sheet1
Prophage region	Position on genome	Orientation	PHASTER annotation	blastp similar protein	hmmer annotation
Xnp1	1051218-1051487	forward	putative acetyltransferase	GNAT family N-acetyltransferase	N-acetyltransferase domain-containing protein
Xnp1	1051563-1052447	forward	IS982 family transposase	IS982 family transposase	Transposase DDE domain
Xnp1	1052684-1053301	reverse	P2 CI-like protein	phage repressor protein	Bacteriophage CI repressor C-terminal domain
Xnp1	1053519-1053866	forward	hypothetical protein	DUF5347 domain-containing protein	Family of unknown function DUF5347
Xnp1	1053955-1055898	forward	gp36	replication endonuclease	Bacteriophage replication gene A protein GPA
Xnp1	1056051-1056263	forward	hypothetical protein	hypothetical protein	Uncharacterized protein
Xnp1	1056282-1056518	forward	SOS induction modulator	DinI family protein	DinI-like family
Xnp1	1056798-1057001	forward	tail component protein	tail protein X	Phage Tail Protein X
Xnp1	1057011-1057274	forward	hypothetical protein	hypothetical protein	Bacteriophage holin family HP1
Xnp1	1057276-1057812	forward	Rz protein	lysis system i-spanin subunit Rz	Bacteriophage Rz lysis protein
Xnp1	1057961-1058596	forward	baseplate assembly protein V	phage baseplate assembly protein V	Type VI secretion system, phage-baseplate injector
Xnp1	1058593-1058943	forward	baseplate wedge subunit	Baseplate assembly protein W GpW/gp25	Gene 25-like lysozyme
Xnp1	1058966-1059874	forward	baseplate assembly protein J	baseplate assembly protein J	Baseplate J-like protein
Xnp1	1059867-1060475	forward	tail fibers protein	phage tail protein I	Phage tail protein Tail_P2_I
Xnp1	1060472-1062658	forward	tail fiber	Phage tail-collar fibre protein	Phage tail-collar fibre protein
Xnp1	1062678-1063001	reverse	hypothetical protein	hypothetical protein containing Glycosyltransferase family 25	Uncharacterized protein Similarities with glycosyltransferase
Xnp1	1063230-1064771	forward	sulfatase-like hydrolase/transferase	phosphoethanolamine transferase	Sulfatase
Xnp1	1065374-1065493	reverse	hypothetical protein	phage tail protein	Uncharacterized protein Similarities with Tail protein
Xnp1	1065634-1066761	forward	side tail fiber protein	Phage Tail Collar Domain	Phage Tail Collar Domain
Xnp1	1066998-1067879	reverse	hypothetical protein	hypothetical protein containing N-Acyltransferase	Mig-14
Xnp1	1068608-1069390	reverse	putative transposase	IS630 family transposase	DDE superfamily endonuclease
Xnp1	1069602-1070126	reverse	putative tail fiber protein	Phage Tail Collar Domain	Uncharacterized protein similarities with tail protein
Xnp1	1070411-1070890	forward	tail fiber protein	Phage Tail Collar Domain	Phage Tail Collar Domain
Xnp1	1070887-1071483	forward	putative tail fiber assembly protein	tail fiber assembly protein	Caudovirales tail fibre assembly protein, lambda gpK
Xnp1	1071629-1072588	reverse	family 1 protein	glycosyltransferase	Glycosyl transferases group 1
Xnp1	1072785-1073735	reverse	membrane-associated initiation of head vertex	Phage Tail Collar Domain	Phage Tail Collar Domain
Xnp1	1074260-1075432	forward	major tail sheath protein	phage tail sheath protein FI	Phage tail sheath protein subtilisin-like domain
Xnp1	1075444-1075962	forward	major tail tube protein	phage major tail tube protein FII	Phage tail tube protein FII
Xnp1	1076172-1076489	forward	tail protein E	phage tail assembly protein E	Phage tail assembly chaperone proteins, E, or 41 or 14
Xnp1	1076501-1076623	forward	tail protein E	GpE family phage tail protein	Phage P2 GpE
Xnp1	1076616-1079726	forward	tail tape measure protein	Phage-related minor tail protein YqbO	Membrane-integrating protein Mistic
Xnp1	1079723-1080229	forward	tail protein	phage tail protein GpU	Phage P2 GpU
Xnp1	1080226-1081749	forward	gene D protein	Phage late control gene D protein GPD	Phage late control gene D protein GPD
Xnp1	1081831-1082067	forward	OGR regulator of late gene transcription	Recombinase zinc beta ribbon domain	Ogr/Delta-like zinc finger
Xnp1	1082227-1082445	reverse	YdcH family protein	YdcH family protein	Protein of unknown function DUF465
Xnp1	1082738-1083214	forward	ecotin, a serine protease inhibitor	serine protease inhibitor ecotin	Ecotin
Xnp1	1083512-1084207	forward	aquaporin Z	aquaporin Z	Major intrinsic protein
Xnp1	1084473-1085234	reverse	ISSod6 transposase	IS5 family transposase	Transposase DDE domain
Xnp4	1860349-1860361	forward	attL	-	-
Xnp4	1874421-1875551	reverse	PROPHAGE_Escher_CFT073: putative prophage integrase	tyrosine-type recombinase/integrase	Phage integrase family
Xnp4	1875913-1876000	reverse	tRNA	-	-
Xnp4	1876183-1876512	forward	PHAGE_Podovi_Lau218_NC_024329: sulfur transfer protein DsrC	sulfurtransferase TusE	DsrC like protein
Xnp4	1876528-1876806	reverse	acylphosphatase	acylphosphatase	Acylphosphatase
Xnp4	1877036-1877353	forward	heat shock protein HspQ	heat shock protein HspQ	Hemimethylated DNA-binding protein YccV like
Xnp4	1877422-1877835	reverse	CoA-binding protein	CoA-binding protein	CoA binding domain
Xnp4	1877981-1878199	forward	methylglyoxal synthase	methylglyoxal synthase	MGS-like domain
Xnp4	1878219-1878434	forward	TIGR01666 family membrane protein	FUSC-like inner membrane protein yccS	FUSC-like inner membrane protein yccS
Xnp4	1878537-1879184	forward	predicted transposase	ISAs1 family transposase	DDE_Tnp_1-associated
Xnp4	1879188-1880072	reverse	IS982 family transposase	IS982 family transposase	Transposase DDE domain
Xnp4	1880165-1880683	forward	predicted transposase	ISAs1 family transposase	Transposase DDE domain
Xnp4	1880704-1880868	forward	hypothetical protein	FUSC-like inner membrane protein yccS	FUSC-like inner membrane protein yccS
Xnp4	1880884-1881321	reverse	IS630 family transposase	IS630 family transposase	DDE superfamily endonuclease
Xnp4	1881392-1881717	reverse	transposase	IS630 family transposase	Transposase
Xnp4	1881664-1881975	forward	transposase	IS630 family transposase	Transposase
Xnp4	1882007-1882483	forward	IS630 family transposase	IS630 family transposase	DDE superfamily endonuclease
Xnp4	1882953-1883207	reverse	putative phage tail fiber protein	Phage T4 tail fibre
Xnp4	1883224-1886802	reverse	phage tail protein	Phage-related protein tail, Domain of unknown function DUF1983	Domain of unknown function DUF1983
Xnp4	1886855-1887463	reverse	tail assembly protein	Phage-related protein, tail component	Bacteriophage lambda tail assembly protein I
Xnp4	1887671-1889215	forward	IS21 transposase	IS21 transposase	Integrase core domain
Xnp4	1889227-1889979	forward	transposase/IS protein	IS21-like element helper ATPase IstB	IstB-like ATP binding protein
Xnp4	1890212-1891243	forward	putative transposase	IS630 family transposase	DDE superfamily endonuclease
Xnp4	1891514-1892050	reverse	IS630 family transposase	IS630 family transposase	DDE superfamily endonuclease
Xnp4	1892044-1892481	reverse	helix-turn-helix domain-containing protein	helix-turn-helix domain-containing protein	Winged helix-turn helix
Xnp4	1892913-1893128	reverse	Csp	cold shock protein CspG	'Cold-shock' DNA-binding domain
Xnp4	1893382-1893588	forward	central tail fiber	Phage-related protein, tail component
Xnp4	1893592-1894537	reverse	predicted transposase	transposase fragment	DDE_Tnp_1-associated
Xnp4	1894581-1895213	forward	truncated transposase	IS66-like element accessory protein TnpA	Transposase
Xnp4	1895213-1895560	forward	transposase	IS66 family insertion sequence element accessory protein TnpB	IS66 Orf2 like protein
Xnp4	1895580-1897151	forward	transposase	Transposase IS66 family	Transposase IS66 family
Xnp4	1900996-1901008	forward	attR	-	-
Xnp2	3025064-3025076	forward	attL	-	-
Xnp2	3025386-3025784	forward	hypothetical protein	hypothetical protein	Putative exported protein
Xnp2	3025862-3026080	reverse	OGR regulator of late gene transcription	ogr/Delta-like zinc finger family protein	Ogr/Delta-like zinc finger
Xnp2	3026254-3026436	reverse	hypothetical protein	hypothetical protein	Uncharacterized protein
Xnp2	3026435-3026755	forward	hypothetical protein	hypothetical protein	Uncharacterized protein
Xnp2	3026801-3027895	reverse	gene D protein	phage late control D family protein	Phage late control gene D protein GPD
Xnp2	3027910-3028374	reverse	tail protein	Phage tail protein P2 GpU	Phage P2 GpU
Xnp2	3028377-3031166	reverse	tail tape measure protein	phage tail tape measure protein	Phage-related minor tail protein
Xnp2	3031159-3031281	reverse	tail protein E'	GpE family phage tail protein	Phage P2 GpE
Xnp2	3031293-3031610	reverse	tail protein E	phage tail assembly protein E	Phage tail assembly chaperone proteins, E, or 41 or 14
Xnp2	3031650-3032165	reverse	major tail tube protein	phage major tail tube protein FII	Phage tail tube protein FII
Xnp2	3032176-3033348	reverse	major tail sheath protein	major tail sheath protein FI	Phage tail sheath protein subtilisin-like domain
Xnp2	3033672-3034367	forward	methyltransferase domain-containing protein	methyltransferase domain-containing protein	Methyltransferase domain
Xnp2	3034552-3035085	reverse	tail fiber assembly protein	tail fiber assembly protein	Caudovirales tail fibre assembly protein, lambda gpK
Xnp2	3035090-3036859	reverse	tail fiber protein	Phage tail-collar fibre protein	Phage tail-collar fibre protein
Xnp2	3036856-3037464	reverse	tail protein I	phage tail protein I	Phage tail protein Tail_P2_I
Xnp2	3037457-3038365	reverse	baseplate assembly protein	Baseplate J-like protein	Baseplate J-like protein
Xnp2	3038370-3038711	reverse	baseplate assembly protein W	baseplate assembly protein GPW/gp25	Gene 25-like lysozyme
Xnp2	3038708-3039361	reverse	phage baseplate assembly protein	phage baseplate assembly protein V	Type VI secretion system, phage-baseplate injector
Xnp2	3039428-3040063	reverse	tail protein	phage virion morphogenesis protein tail	Phage virion morphogenesis family
Xnp2	3040066-3040482	reverse	tail protein	P2 phage tail completion protein R GpR	P2 phage tail completion protein R GpR
Xnp2	3040545-3040742	forward	hypothetical protein	hypothetical protein	Uncharacterized protein
Xnp2	3040755-3041207	reverse	bacteriophage lysis protein Lambda gpRz homolog	Bacteriophage Rz lysis protein	Bacteriophage Rz lysis protein
Xnp2	3041207-3041602	reverse	hypothetical protein	virion protein Provisional	putative internal virion protein D
Xnp2	3041595-3041918	reverse	bacteriophage lysis protein holin	Phage holin family Lysis protein S	Phage holin family Lysis protein S
Xnp2	3041922-3042125	reverse	tail component protein	Phage Tail Protein X	Phage Tail Protein X
Xnp2	3042125-3042589	reverse	head completion-stabilization protein	head completion/stabilization protein	Phage head completion protein GPL
Xnp2	3042677-3043339	reverse	terminase endonuclease subunit	Phage small terminase subunit	Phage small terminase subunit
Xnp2	3043341-3044450	reverse	major capsid protein	Phage major capsid protein P2 family	Phage major capsid protein, P2 family
Xnp2	3044466-3045302	reverse	capsid scaffolding protein	Phage capsid scaffolding protein GPO serine peptidase	Phage capsid scaffolding protein GPO serine peptidase
Xnp2	3045321-3045461	forward	hypothetical protein	hypothetical protein	Uncharacterized protein
Xnp2	3045445-3047205	forward	terminase ATPase subunit	Putative ATPase subunit of terminase gpP-like	Terminase-like family
Xnp2	3047205-3048233	forward	capsid packaging protein	phage portal protein	Phage portal protein
Xnp2	3048761-3049264	forward	DNA helicase	DUF4760 domain-containing protein	Domain of unknown function DUF4760
Xnp2	3049321-3049653	reverse	hypothetical protein	hypothetical protein	Uncharacterized protein
Xnp2	3049671-3050366	reverse	terminase ATPase subunit	terminase family protein	Terminase-like family
Xnp2	3050372-3050572	reverse	hypothetical protein	hypothetical protein	Uncharacterized protein similarities with OmpA-like
Xnp2	3050569-3051738	reverse	putative methylase	DNA cytosine methyltransferase	C-5 cytosine-specific DNA methylase
Xnp2	3051732-3051992	reverse	sliding clamp DNA polymerase	hypothetical protein	Domain of unknown function DUF5405
Xnp2	3051989-3054103	reverse	replication protein A	Bacteriophage replication gene A protein GPA	Bacteriophage replication gene A protein GPA
Xnp2	3054112-3055117	reverse	Orf84	phosphoadenosine phosphosulfate reductase family protein	Phosphoadenosine phosphosulfate reductase family
Xnp2	3055114-3055938	reverse	DNA adenine methyltransferase	Dam family site-specific DNA-adenine-N6-methyltransferase	D12 class N6 adenine-specific DNA methyltransferase
Xnp2	3055940-3056161	reverse	hypothetical protein	TraR/DksA family transcriptional regulator	Prokaryotic dksA/traR C4-type zinc finger
Xnp2	3056154-3056402	reverse	hypothetical protein	DUF2732 domain-containing protein	Protein of unknown function DUF2732
Xnp2	3056474-3056824	reverse	hypothetical protein	DUF5347 domain-containing protein	Family of unknown function DUF5347
Xnp2	3056835-3057002	reverse	hypothetical protein	hypothetical protein	Uncharacterized protein
Xnp2	3057235-3057612	reverse	hypothetical protein	Regulatory phage protein cox	Regulatory phage protein cox
Xnp2	3057634-3057909	reverse	hypothetical protein	Regulatory phage protein cox	Regulatory phage protein cox
Xnp2	3058001-3058291	forward	gpC	helix-turn-helix domain-containing protein	Helix-turn-helix
Xnp2	3058288-3058575	forward	gpC	helix-turn-helix domain-containing protein	Helix-turn-helix
Xnp2	3058488-3058500	forward	attR	-	-
Xnp2	3058665-3058802	forward	gpC	C protein	putative Repressor protein C
Xnp2	3058887-3059900	forward	integrase	tyrosine-type recombinase/integrase	Phage integrase family
Xnp2	3060024-3060587	forward	YqgE/AlgH family protein	YqgE/AlgH family protein	Uncharacterized ACR, COG1678
Xnp2	3060587-3061006	forward	Holliday junction resolvase RuvX	Holliday junction resolvase RuvX	Holliday junction resolvase
Xnp2	3061442-3063058	reverse	Old	AAA family ATPase	AAA ATPase domain
Xnp3	3282364-3282382	forward	attL	-	-
Xnp3	3283188-3283313	forward	integrase	Phage integrase DNA-binding prophage protein	Phage integrase, N-terminal
Xnp3	3283443-3283793	forward	hypothetical protein	DUF3486 family protein	Protein of unknown function DUF3486
Xnp3	3283952-3284566	reverse	repressor	Helix-turn-helix XRE-family like proteins	putative Bacteriophage CI repressor with HTH cro/C1-type
Xnp3	3284725-3284943	forward	transcriptional regulator	helix-turn-helix domain-containing protein	Winged helix-turn-helix DNA-binding
Xnp3	3284963-3286508	forward	transposase	Mu transposase	Bacteriophage Mu transposase
Xnp3	3286520-3287473	forward	DNA transposition protein	Bacteriophage DNA transposition protein	Mu B transposition protein, C terminal
Xnp3	3287470-3287724	forward	hypothetical protein	hypothetical protein	Uncharacterized protein
Xnp3	3287740-3287949	forward	hypothetical protein	hypothetical protein	Uncharacterized protein
Xnp3	3287982-3288611	forward	gp05	DUF3164 family protein	Protein of unknown function DUF3164
Xnp3	3288613-3288845	forward	ANR family transcriptional regulator	hypothetical protein	Hypothetical prophage protein
Xnp3	3288826-3289014	forward	hypothetical protein	hypothetical protein	Uncharacterized protein
Xnp3	3289097-3289537	forward	hypothetical protein	hypothetical protein	Uncharacterized protein
Xnp3	3289530-3289694	forward	hypothetical protein	hypothetical protein	Uncharacterized protein
Xnp3	3289704-3290240	forward	hypothetical protein	regulatory protein GemA DUF1018	Protein of unknown function DUF1018
Xnp3	3290237-3290743	forward	hypothetical protein	hypothetical protein	Uncharacterized protein
Xnp3	3290744-3291061	forward	hypothetical protein	hypothetical protein	Uncharacterized protein
Xnp3	3291074-3291499	forward	regulator of late transcription	Transcriptional regulator Mor family	Mor transcription activator family
Xnp3	3291606-3292118	forward	membrane-associated initiation of head vertex	N-acetylmuramidase Glycosyl hydrolase 108	Glycosyl hydrolase 108
Xnp3	3292118-3292375	forward	hypothetical protein	hypothetical protein	Uncharacterized protein
Xnp3	3292359-3292586	forward	hypothetical protein	hypothetical protein	Uncharacterized protein
Xnp3	3292583-3293182	forward	hypothetical protein	hypothetical protein	Uncharacterized protein
Xnp3	3293179-3293400	forward	hypothetical protein	Prokaryotic dksA/traR C4-type zinc finger	Prokaryotic dksA/traR C4-type zinc finger
Xnp3	3293393-3293686	forward	hypothetical protein	DUF2730 domain-containing protein	Protein of unknown function DUF2730
Xnp3	3293695-3293982	forward	hypothetical protein	hypothetical protein	Uncharacterized protein
Xnp3	3293982-3294557	forward	hypothetical protein	DUF3486 family protein	Putative Mu-like prophage FluMu protein gp27
Xnp3	3294557-3296107	forward	hypothetical protein	Mu-like prophage FluMu protein gp28	Terminase large subunit, N-terminal
Xnp3	3296110-3297675	forward	portal protein	DUF935 domain-containing protein	Mu-like prophage FluMu protein gp29
Xnp3	3297659-3298387	forward	head morphogenesis protein	minor capsid protein	Phage Mu protein F like protein
Xnp3	3298468-3298959	forward	head morphogenesis protein	phage head morphogenesis protein	Phage Mu protein F like protein
Xnp3	3298956-3299426	forward	virion morphogenesis protein	phage virion morphogenesis protein	Phage virion morphogenesis family
Xnp3	3299519-3299530	forward	attL	-	-
Xnp3	3299593-3300810	forward	protease	Mu-like prophage I protein phage protease	Mu-like prophage I protein Putative protease
Xnp3	3300810-3301733	forward	major head subunit	Mu-like prophage major head subunit gpT	Mu-like prophage major head subunit gpT
Xnp3	3301795-3302103	forward	hypothetical protein	hypothetical protein	Mu-like prophage FluMu N-terminal domain
Xnp3	3302100-3302552	forward	hypothetical protein	DUF1320 family protein	Mu-like prophage protein
Xnp3	3302552-3303094	forward	hypothetical protein	DUF1834 family protein	Mu-like prophage FluMu protein
Xnp3	3303091-3303267	forward	hypothetical protein	DUF2635 family protein	Protein of unknown function DUF2635
Xnp3	3303267-3304739	forward	tail sheath protein	Phage tail sheath protein subtilisin-like domain gpL	Phage tail sheath protein subtilisin-like domain
Xnp3	3304755-3305114	forward	tail tube protein	Phage tail tube protein	Phage tail tube protein
Xnp3	3305117-3305470	forward	hypothetical protein	Phage tail assembly chaperone proteins, E	Phage tail assembly chaperone proteins, E, or 41 or 14
Xnp3	3305603-3307450	forward	phage tail tape measure protein	Phage-related minor tail protein	Phage-related minor tail protein
Xnp3	3307450-3308850	forward	DNA circulation protein	DNA circularization N-terminal domain-containing protein	DNA circularisation protein N-terminus
Xnp3	3308843-3309931	forward	tail protein	tail protein	Putative tail protein
Xnp3	3309928-3310473	forward	baseplate assembly protein	phage baseplate assembly protein V	Bacteriophage Mu Gp45 protein Putative baseplate assembly
Xnp3	3310470-3310919	forward	hypothetical protein	Phage protein GP46	Phage protein GP46
Xnp3	3310920-3311993	forward	baseplate J like protein	baseplate J/gp47 family protein	Baseplate J-like protein
Xnp3	3311984-3312565	forward	hypothetical protein	DUF2313 domain-containing protein	Putative prophage protein
Xnp3	3312575-3313591	forward	tail fiber protein	hypothetical protein similar to tail fiber protein	Uncharacterized protein
Xnp3	3313594-3314127	forward	tail fiber assembly protein	tail fiber assembly protein	Caudovirales tail fibre assembly protein, lambda gpK
Xnp3	3314253-3314684	reverse	tail fiber	tail fiber assembly protein	Caudovirales tail fibre assembly protein, lambda gpK
Xnp3	3314871-3315146	reverse	hypothetical protein	hypothetical protein	Uncharacterized protein
Xnp3	3315426-3316079	forward	integrase	integrase domain-containing protein	Integrase
Xnp3	3316330-3316596	forward	DNA binding protein Ner	Winged helix-turn-helix DNA-binding	Winged helix-turn-helix DNA-binding
Xnp3	3316747-3317181	forward	hypothetical protein	putative membrane protein	Putative membrane protein
Xnp3	3317263-3317592	forward	hypothetical protein	hypothetical protein	Uncharacterized protein
Xnp3	3318327-3318746	reverse	hypothetical protein	hypothetical protein	Uncharacterized protein
Xnp3	3319056-3319667	reverse	CI	XRE family transcriptional regulator	putative Bacteriophage CI repressor with HTH cro/C1-type
Xnp3	3320011-3320421	forward	helix-turn-helix domain protein	helix-turn-helix domain-containing protein	Uncharacterized protein
Xnp3	3320479-3322374	forward	DNA primase/helicase	toprim domain-containing protein	Toprim-like
Xnp3	3322387-3322764	forward	putative antitermination protein Q	Phage antitermination protein Q	Phage antitermination protein Q
Xnp3	3322979-3323179	forward	hypothetical protein	hypothetical protein	Uncharacterized protein
Xnp3	3323290-3324327	forward	putative DNA methylase	site-specific DNA-methyltransferase	DNA methylase
Xnp3	3324398-3324679	reverse	plasmid maintenance system killer HigA	HigA family addiction module antidote protein	Putative proteic killer active protein
Xnp3	3324709-3325335	forward	hypothetical protein	hypothetical protein	ParB-like nuclease domain
Xnp3	3325396-3325674	forward	transposase	IS630 transposase-related protein	Transposase
Xnp3	3325681-3326226	forward	IS630 family transposase	IS630 transposase-related protein	DDE superfamily endonuclease
Xnp3	3326251-3326532	forward	hypothetical protein	hypothetical protein	Uncharacterized protein
Xnp3	3326922-3328433	forward	hypothetical protein	SIR2 family protein	SIR2-like domain
Xnp3	3328522-3328785	reverse	DNA binding protein Ner	Winged helix-turn-helix DNA-binding	Winged helix-turn-helix DNA-binding
Xnp3	3329062-3330723	reverse	hypothetical protein	Phage terminase-like protein, large subunit	Phage Terminase
Xnp3	3330720-3331073	reverse	terminase small subunit	Phage terminase, small subunit	Phage terminase, small subunit
Xnp3	3331204-3331638	reverse	hypothetical protein	HNH endonuclease	Putative holin protein
Xnp3	3331638-3331940	reverse	head-tail connector II	Head-Tail Connector Protein gp6	Phage gp6-like head-tail connector protein
Xnp3	3331933-3332271	reverse	head-tail connector II	phage head closure protein	Phage head-tail joining protein
Xnp3	3332268-3333485	reverse	Portal protein	Phage portal protein	Phage portal protein
Xnp3	3333488-3334036	reverse	putative prohead protease	Phage head maturation protease	Caudovirus prohead serine protease
Xnp3	3334076-3335230	reverse	phage major capsid protein	phage major capsid protein	Putative major capsid protein
Xnp3	3335393-3335581	reverse	hypothetical protein	hypothetical protein	Uncharacterized protein
Xnp3	3335788-3336630	reverse	hypothetical protein	DUF6402 family protein	Uncharacterized protein
Xnp3	3336633-3337367	reverse	Hcp family type VI secretion system effector	Hcp family type VI secretion system effector	Type VI secretion system effector, Hcp
Xnp3	3337871-3340303	reverse	DNA primase	toprim domain-containing protein	Poxvirus D5 protein-like
Xnp3	3340307-3340717	reverse	hypothetical protein	hypothetical protein	Uncharacterized protein
Xnp3	3340710-3340865	reverse	hypothetical protein	hypothetical protein	Uncharacterized protein
Xnp3	3341059-3341241	forward	hypothetical protein	hypothetical protein	Uncharacterized protein
Xnp3	3341481-3341693	reverse	gp52	AlpA family transcriptional regulator	Prophage CP4-57 regulatory protein AlpA
Xnp3	3341695-3341706	forward	attR	-	-
Xnp3	3341964-3343226	reverse	integrase	integrase arm-type DNA-binding	Integrase Bacteriophage integrase
Xnp3	3349766-3349784	forward	attR	-	-
