# Supplementary material for: Identification of novel prophage regions in Xenorhabdus nematophila genome and gene expression analysis during phage-like particle induction
Source: PeerJ. 2022 Feb 15;10:e12956. doi: 10.7717/peerj.12956 (PMC8855722; doi:10.7717/peerj.12956)
Supplement: Supplemental Information 4 [file peerj-10-12956-s004.xlsx]

## Sheet: Sheet1
Reference	location in reference	orientation	PHASTER annotation	NCBI annotation	hmmer
Bacteriophage SfMu NC_027382	326-850	reverse	c-repressor protein	c-repressor protein	Mu DNA-binding domain
Bacteriophage SfMu NC_027382	1040-1261	forward	DNA binding protein Ner	helix-turn-helix domain-containing protein	Winged helix-turn-helix DNA-binding
Bacteriophage SfMu NC_027382	1269-3257	forward	transposase	Mu transposase C-terminal domain-containing protein	Bacteriophage Mu transposase
Bacteriophage SfMu NC_027382	3296-4234	forward	DNA transposition protein	AAA family ATPase	Mu B transposition protein, C terminal
Bacteriophage SfMu NC_027382	4250-4477	forward	hypothetical protein	hypothetical protein	Uncharacterised protein
Bacteriophage SfMu NC_027382	4480-4710	forward	hypothetical protein	hypothetical protein	Uncharacterised protein
Bacteriophage SfMu NC_027382	4722-4985	forward	hypothetical protein	hypothetical protein	Uncharacterised protein
Bacteriophage SfMu NC_027382	5000-5419	forward	hypothetical protein	hypothetical protein	Uncharacterised protein
Bacteriophage SfMu NC_027382	5432-5719	forward	hypothetical protein	hypothetical protein	RWP-RK domain
Bacteriophage SfMu NC_027382	5738-6262	forward	host nuclease inhibitor protein	host-nuclease inhibitor Gam family protein	Bacteriophage Mu Gam like protein
Bacteriophage SfMu NC_027382	6354-6908	forward	hypothetical protein	DUF5420 family protein	Family of unknown function (DUF5420)
Bacteriophage SfMu NC_027382	6912-7442	forward	hypothetical protein	hypothetical protein	Uncharacterised protein
Bacteriophage SfMu NC_027382	7957-8139	forward	hypothetical protein	hypothetical protein	DnaJ central domain
Bacteriophage SfMu NC_027382	8141-8449	forward	hypothetical protein	hypothetical protein	Uncharacterised protein
Bacteriophage SfMu NC_027382	8446-8748	forward	hypothetical protein	hypothetical protein	Uncharacterised protein
Bacteriophage SfMu NC_027382	8687-8953	reverse	hypothetical protein	hypothetical protein	Uncharacterised protein
Bacteriophage SfMu NC_027382	9023-9574	forward	hypothetical protein	regulatory protein GemA	Protein of unknown function (DUF1018)
Bacteriophage SfMu NC_027382	9571-9960	forward	middle operon regulator	Middle operon regulator	Mor transcription activator family
Bacteriophage SfMu NC_027382	10038-10268	forward	hypothetical protein	hypothetical protein	Uncharacterised protein
Bacteriophage SfMu NC_027382	10249-10368	forward	hypothetical protein	hypothetical protein	Uncharacterised protein
Bacteriophage SfMu NC_027382	10381-10803	forward	regulator of late transcription	positive regulator of late transcription	Mor transcription activator family
Bacteriophage SfMu NC_027382	10898-11413	forward	lysozyme	lysozyme	Phage lysozyme
Bacteriophage SfMu NC_027382	11397-11783	forward	putative Rz	putative Rz	Uncharacterised protein
Bacteriophage SfMu NC_027382	11942-12136	forward	hypothetical protein	hypothetical protein	Uncharacterised protein
Bacteriophage SfMu NC_027382	12136-12438	forward	hypothetical protein	DUF2730 family protein	Protein of unknown function (DUF2730)
Bacteriophage SfMu NC_027382	12435-12725	forward	hypothetical protein	hypothetical protein	Uncharacterised protein
Bacteriophage SfMu NC_027382	12737-13312	forward	hypothetical protein	DUF3486 family protein	Protein of unknown function (DUF3486)
Bacteriophage SfMu NC_027382	13320-14975	forward	hypothetical protein	terminase family protein	Terminase large subunit, T4likevirus-type, N-terminal
Bacteriophage SfMu NC_027382	14975-16513	forward	portal protein	DUF935 family protein	Protein of unknown function (DUF935)
Bacteriophage SfMu NC_027382	16494-17813	forward	head morphogenesis protein	head morphogenesis protein	Phage Mu protein F like protein
Bacteriophage SfMu NC_027382	17810-1828	forward	virion morphogenesis protein	virion morphogenesis protein	Phage virion morphogenesis family
Bacteriophage SfMu NC_027382	18477-19562	forward	protease	protease	Mu-like prophage I protein
Bacteriophage SfMu NC_027382	19011-19562	forward	scaffold protein	scaffold protein	Mu-like prophage I protein
Bacteriophage SfMu NC_027382	19559-20476	forward	major head subunit	Mu-like promajor head subunit gpT family protein	Mu-like prophage major head subunit gpT
Bacteriophage SfMu NC_027382	20543-20953	forward	hypothetical protein	hypothetical protein	Mu-like prophage FluMu N-terminal domain
Bacteriophage SfMu NC_027382	20950-21372	forward	hypothetical protein	DUF1320 family protein	Protein of unknown function (DUF1320)
Bacteriophage SfMu NC_027382	21372-21920	forward	hypothetical protein	DUF1834 family protein	Domain of unknown function (DUF1834)
Bacteriophage SfMu NC_027382	21907-22110	forward	hypothetical protein	DUF2635 domain-containing protein	Protein of unknown function (DUF2635)
Bacteriophage SfMu NC_027382	22107-23594	forward	tail sheath protein	tail sheath subtilisin-like domain-containing protein	Phage tail sheath protein subtilisin-like domain
Bacteriophage SfMu NC_027382	23604-23960	forward	tail tube protein	tail tube protein	Phage tail tube protein
Bacteriophage SfMu NC_027382	23970-24404	forward	hypothetical protein	tail assembly protein	Phage tail assembly chaperone proteins, E, or 41 or 14
Bacteriophage SfMu NC_027382	24549-26621	forward	tail tape measure protein	tape measure protein	Tape measure protein
Bacteriophage SfMu NC_027382	26626-28113	forward	DNA circulation protein	DNA circularization N-terminal domain-containing protein	DNA circularisation protein N-terminus
Bacteriophage SfMu NC_027382	28106-29239	forward	tail protein	baseplate protein	Phage tail baseplate hub (GPD)
Bacteriophage SfMu NC_027382	29227-29820	forward	baseplate assembly protein	baseplate assembly protein V	Bacteriophage Mu Gp45 spike protein
Bacteriophage SfMu NC_027382	29817-30254	forward	hypothetical protein	GP46 family protein	Phage protein GP46
Bacteriophage SfMu NC_027382	30255-31337	forward	baseplate J like protein	baseplate J/gp47 family protein	Baseplate J-like protein
Bacteriophage SfMu NC_027382	31328-31870	forward	hypothetical protein	DUF2313 domain-containing protein	Uncharacterised protein conserved in bacteria (DUF2313)
Bacteriophage SfMu NC_027382	31870-33336	forward	tail fiber protein	tail protein	Phage tail fibre repeat
Bacteriophage SfMu NC_027382	33339-33872	forward	tail fiber assembly protein	tail fiber assembly protein	Caudovirales tail fibre assembly protein, lambda gpK
Bacteriophage SfMu NC_027382	33901-34428	reverse	tail fiber assembly protein	tail fiber assembly protein	Caudovirales tail fibre assembly protein, lambda gpK
Bacteriophage SfMu NC_027382	34430-35395	reverse	tail fiber protein	tail fiber protein	tail fiber protein
Bacteriophage SfMu NC_027382	35521-36114	forward	DNA invertase	recombinase family protein	Resolvase, N terminal domain
Bacteriophage SfMu NC_027382	36197-36385	forward	Com protein	Com family DNA-binding transcriptional regulator	Mu-like prophage protein Com
Bacteriophage SfMu NC_027382	36306-37031	forward	Mom protein	protein mom	protein mom
Bacteriophage D108 NC_013594	340-864	reverse	Repressor protein CI	Repressor protein CI	Mu DNA-binding domain
Bacteriophage D108 NC_013594	1050-1271	forward	Ner	helix-turn-helix domain-containing protein	Winged helix-turn-helix DNA-binding
Bacteriophage D108 NC_013594	1279-3267	forward	DNA transposition protein A	Mu transposase C-terminal domain-containing protein	Bacteriophage Mu transposase
Bacteriophage D108 NC_013594	3306-4244	forward	DNA transposition protein B	AAA family ATPase	Mu B transposition protein, C terminal
Bacteriophage D108 NC_013594	4260-4487	forward	Kil	Kil	hypothetical protein
Bacteriophage D108 NC_013594	4490-4711	forward	hypothetical protein	hypothetical protein	hypothetical protein
Bacteriophage D108 NC_013594	4732-5001	forward	hypothetical protein	hypothetical protein	hypothetical protein
Bacteriophage D108 NC_013594	5022-5441	forward	hypothetical protein	hypothetical protein	hypothetical protein
Bacteriophage D108 NC_013594	5442-5741	forward	hypothetical protein	hypothetical protein	RWP-RK domain
Bacteriophage D108 NC_013594	5761-6285	forward	Gam	host-nuclease inhibitor Gam family protein	Bacteriophage Mu Gam like protein
Bacteriophage D108 NC_013594	6384-6914	forward	hypothetical protein	hypothetical protein	hypothetical protein
Bacteriophage D108 NC_013594	6914-7444	forward	hypothetical protein	hypothetical protein	hypothetical protein
Bacteriophage D108 NC_013594	7431-7613	forward	hypothetical protein	hypothetical protein	DnaJ central domain
Bacteriophage D108 NC_013594	7615-7905	forward	hypothetical protein	hypothetical protein	hypothetical protein
Bacteriophage D108 NC_013594	8282-8833	forward	hypothetical protein	regulatory protein GemA	Protein of unknown function (DUF1018)
Bacteriophage D108 NC_013594	8830-9219	forward	GemB	Middle operon regulator	Mor transcription activator family
Bacteriophage D108 NC_013594	9297-9515	forward	hypothetical protein	hypothetical protein	hypothetical protein
Bacteriophage D108 NC_013594	9508-9870	forward	hypothetical protein	hypothetical protein	hypothetical protein
Bacteriophage D108 NC_013594	9880-9999	forward	hypothetical protein	hypothetical protein	Transmembrane domain of unknown function (DUF3566)
Bacteriophage D108 NC_013594	10012-10434	forward	late gene transcriptional activator	positive regulator of late transcription	Mor transcription activator family
Bacteriophage D108 NC_013594	10529-11044	forward	Lys	lysozyme	Phage lysozyme
Bacteriophage D108 NC_013594	11028-11414	forward	hypothetical protein	hypothetical protein	hypothetical protein
Bacteriophage D108 NC_013594	11573-11767	forward	hypothetical protein	hypothetical protein	hypothetical protein
Bacteriophage D108 NC_013594	11767-12066	forward	hypothetical protein	DUF2730 family protein	Protein of unknown function (DUF2730)
Bacteriophage D108 NC_013594	12063-12353	forward	hypothetical protein	hypothetical protein	hypothetical protein
Bacteriophage D108 NC_013594	12365-12940	forward	hypothetical protein	DUF3486 family protein	Protein of unknown function (DUF3486)
Bacteriophage D108 NC_013594	12948-14603	forward	hypothetical protein	terminase family protein	Terminase large subunit, T4likevirus-type, N-terminal
Bacteriophage D108 NC_013594	14603-16141	forward	portal protein	DUF935 family protein	Protein of unknown function (DUF935)
Bacteriophage D108 NC_013594	16122-17441	forward	virion morphogenesis	head morphogenesis protein	Phage Mu protein F like protein
Bacteriophage D108 NC_013594	17438-17908	forward	virion morphogenesis protein	virion morphogenesis protein	Phage virion morphogenesis family
Bacteriophage D108 NC_013594	17914-18042	forward	hypothetical protein	hypothetical protein	hypothetical protein
Bacteriophage D108 NC_013594	18105-19190	forward	protease	protease	Mu-like prophage I protein
Bacteriophage D108 NC_013594	18639-19190	forward	scaffold protein	scaffold protein	Mu-like prophage I protein
Bacteriophage D108 NC_013594	19191-20170	forward	major head protein	Mu-like promajor head subunit gpT family protein	Mu-like prophage major head subunit gpT
Bacteriophage D108 NC_013594	20171-20581	forward	hypothetical protein	hypothetical protein	Mu-like prophage FluMu N-terminal domain
Bacteriophage D108 NC_013594	20578-21003	forward	hypothetical protein	DUF1320 family protein	Protein of unknown function (DUF1320)
Bacteriophage D108 NC_013594	21003-21551	forward	hypothetical protein	DUF1834 family protein	Domain of unknown function (DUF1834)
Bacteriophage D108 NC_013594	21535-21741	forward	hypothetical protein	DUF2635 domain-containing protein	Protein of unknown function (DUF2635)
Bacteriophage D108 NC_013594	21738-23225	forward	tail sheath protein	tail sheath subtilisin-like domain-containing protein	Phage tail sheath protein subtilisin-like domain
Bacteriophage D108 NC_013594	23235-23591	forward	tail tube protein	tail tube protein	Phage tail tube protein
Bacteriophage D108 NC_013594	23601-24035	forward	hypothetical protein	tail assembly protein	Phage tail assembly chaperone proteins, E, or 41 or 14
Bacteriophage D108 NC_013594	24019-24165	forward	hypothetical protein	hypothetical protein	hypothetical protein
Bacteriophage D108 NC_013594	24180-26252	forward	tail assembly protein	tape measure protein	Tape measure protein
Bacteriophage D108 NC_013594	26257-27744	forward	DNA circularization protein	DNA circularization N-terminal domain-containing protein	DNA circularisation protein N-terminus
Bacteriophage D108 NC_013594	27737-28876	forward	baseplate assembly protein	baseplate protein	Phage tail baseplate hub (GPD)
Bacteriophage D108 NC_013594	28864-29457	forward	baseplate assembly protein	baseplate assembly protein V	Bacteriophage Mu Gp45 spike protein
Bacteriophage D108 NC_013594	29454-29891	forward	hypothetical protein	GP46 family protein	Phage protein GP46
Bacteriophage D108 NC_013594	29892-30974	forward	hypothetical protein	baseplate J/gp47 family protein	Baseplate J-like protein
Bacteriophage D108 NC_013594	30965-31507	forward	hypothetical protein	DUF2313 domain-containing protein	Uncharacterised protein conserved in bacteria (DUF2313)
Bacteriophage D108 NC_013594	31507-33009	forward	tail fiber protein	tail fiber protein	Phage tail fibre repeat
Bacteriophage D108 NC_013594	33013-33540	forward	probable tail fiber assembly protein	tail fiber assembly protein	Caudovirales tail fibre assembly protein, lambda gpK
Bacteriophage D108 NC_013594	33569-34102	reverse	tail fiber assembly protein	tail fiber assembly protein	Caudovirales tail fibre assembly protein, lambda gpK
Bacteriophage D108 NC_013594	34105-34998	reverse	tail fiber fragment	tail fiber fragment	hypothetical protein
Bacteriophage D108 NC_013594	35130-35723	forward	G region invertase	recombinase family protein	Resolvase, N terminal domain
Bacteriophage D108 NC_013594	35806-35994	forward	Com	Com family DNA-binding transcriptional regulator	Mu-like prophage protein Com
Bacteriophage D108 NC_013594	35915-36652	forward	DNA modification protein Mom	protein mom	hypothetical protein
Bacteriophage D108 NC_013594	36697-37143	forward	D108-specific protein	D108-specific protein	hypothetical protein
NZ_NITZ01000005 Xenorhabdus miraniensis strain DSM17902	500-1081	reverse	hypothetical protein	DUF2313 domain-containing protein	Uncharacterised protein conserved in bacteria DUF2313
NZ_NITZ01000005 Xenorhabdus miraniensis strain DSM17902	1072-2145	reverse	hypothetical protein	baseplate J/gp47 family protein	Baseplate J-like protein
NZ_NITZ01000005 Xenorhabdus miraniensis strain DSM17902	2146-2595	reverse	hypothetical protein	Phage protein GP46	Phage protein GP46
NZ_NITZ01000005 Xenorhabdus miraniensis strain DSM17902	2592-3134	reverse	baseplate assembly protein	phage baseplate assembly protein V	Bacteriophage Mu Gp45 spike protein
NZ_NITZ01000005 Xenorhabdus miraniensis strain DSM17902	3131-4219	reverse	baseplate assembly protein	phage tail protein	Phage tail baseplate hub GPD
NZ_NITZ01000005 Xenorhabdus miraniensis strain DSM17902	4212-5558	reverse	DNA circularization protein	DNA circularisation N-terminal protein	DNA circularisation protein N-terminus
NZ_NITZ01000005 Xenorhabdus miraniensis strain DSM17902	5558-7414	reverse	phage tail tape measure protein	Phage tail tape-measure protein	Uncharacterised protein
NZ_NITZ01000005 Xenorhabdus miraniensis strain DSM17902	7411-7545	reverse	hypothetical protein	conserved protein of unknown function	Uncharacterised protein
NZ_NITZ01000005 Xenorhabdus miraniensis strain DSM17902	7547-7897	reverse	hypothetical protein	Phage tail assembly chaperone proteins, E, or 41 or 14	Phage tail assembly chaperone proteins, E, or 41 or 14
NZ_NITZ01000005 Xenorhabdus miraniensis strain DSM17902	7898-8257	reverse	tail tube protein	phage tail tube protein	Phage tail tube protein
NZ_NITZ01000005 Xenorhabdus miraniensis strain DSM17902	8273-9745	reverse	tail sheath protein	phage tail sheath subtilisin-like domain-containing protein	Phage tail sheath protein subtilisin-like domain
NZ_NITZ01000005 Xenorhabdus miraniensis strain DSM17902	9745-9924	reverse	hypothetical protein	DUF2635 domain-containing protein	Protein of unknown function DUF2635
NZ_NITZ01000005 Xenorhabdus miraniensis strain DSM17902	9921-10463	reverse	hypothetical protein	DUF1834 family protein	Domain of unknown function DUF1834
NZ_NITZ01000005 Xenorhabdus miraniensis strain DSM17902	10463-10915	reverse	hypothetical protein	DUF1320 family protein	Protein of unknown function DUF1320
NZ_NITZ01000005 Xenorhabdus miraniensis strain DSM17902	10912-11226	reverse	hypothetical protein	hypothetical	Mu-like prophage FluMu N-terminal domain
NZ_NITZ01000005 Xenorhabdus miraniensis strain DSM17902	11287-12210	reverse	major head protein	Mu-like prophage major head subunit gpT family protein	Mu-like prophage major head subunit gpT
NZ_NITZ01000005 Xenorhabdus miraniensis strain DSM17902	12210-13520	reverse	protease	phage protease	Mu-like prophage I protein
NZ_NITZ01000005 Xenorhabdus miraniensis strain DSM17902	13592-14062	reverse	virion morphogenesis protein	phage virion morphogenesis protein	Phage virion morphogenesis family
NZ_NITZ01000005 Xenorhabdus miraniensis strain DSM17902	14059-15351	reverse	virion morphogenesis	minor capsid protein	Phage Mu protein F like protein
NZ_NITZ01000005 Xenorhabdus miraniensis strain DSM17902	15335-16915	reverse	portal protein	Mu-like prophage FluMu protein gp29	Protein of unknown function DUF935
NZ_NITZ01000005 Xenorhabdus miraniensis strain DSM17902	16912-18471	reverse	hypothetical protein	terminase family protein	Terminase large subunit, T4likevirus-type, N-terminal
NZ_NITZ01000005 Xenorhabdus miraniensis strain DSM17902	18471-19043	reverse	hypothetical protein	DUF3486 family protein	Protein of unknown function DUF3486
NZ_NITZ01000005 Xenorhabdus miraniensis strain DSM17902	19045-19341	reverse	hypothetical protein	hypothetical	Uncharacterised protein
NZ_NITZ01000005 Xenorhabdus miraniensis strain DSM17902	19341-19613	reverse	hypothetical protein	DUF2730 family protein	Protein of unknown function DUF2730
NZ_NITZ01000005 Xenorhabdus miraniensis strain DSM17902	19627-19848	reverse	C4-type zinc finger protein	TraR/DksA C4-type zinc finger protein	Prokaryotic dksA/traR C4-type zinc finger
NZ_NITZ01000005 Xenorhabdus miraniensis strain DSM17902	19845-20444	reverse	hypothetical protein	hypothetical	Uncharacterised protein
NZ_NITZ01000005 Xenorhabdus miraniensis strain DSM17902	20437-20670	reverse	hypothetical protein	hypothetical	UbiA prenyltransferase family
NZ_NITZ01000005 Xenorhabdus miraniensis strain DSM17902	20654-20917	reverse	hypothetical protein	hypothetical	Uncharacterised protein
NZ_NITZ01000005 Xenorhabdus miraniensis strain DSM17902	20917-21435	reverse	holin	N-acetylmuramidase	Glycosyl hydrolase 108
NZ_NITZ01000005 Xenorhabdus miraniensis strain DSM17902	21535-21960	reverse	late gene transcriptional activator	transcriptional regulator	Mor transcription activator family
NZ_NITZ01000005 Xenorhabdus miraniensis strain DSM17902	22280-22801	reverse	hypothetical protein	hypothetical	Uncharacterised protein
NZ_NITZ01000005 Xenorhabdus miraniensis strain DSM17902	22798-23331	reverse	hypothetical protein	regulatory protein GemA	Protein of unknown function DUF1018
NZ_NITZ01000005 Xenorhabdus miraniensis strain DSM17902	23343-23570	reverse	hypothetical protein	hypothetical	Uncharacterised protein
NZ_NITZ01000005 Xenorhabdus miraniensis strain DSM17902	23691-23879	reverse	hypothetical protein	hypothetical	Uncharacterised protein
NZ_NITZ01000005 Xenorhabdus miraniensis strain DSM17902	23860-24093	reverse	hypothetical protein	ANR family transcriptional regulator	Uncharacterised protein family UPF0240
NZ_NITZ01000005 Xenorhabdus miraniensis strain DSM17902	24095-24727	reverse	gp05	DUF3164 family protein	Protein of unknown function DUF3164
NZ_NITZ01000005 Xenorhabdus miraniensis strain DSM17902	24717-24920	reverse	hypothetical protein	hypothetical	Uncharacterised protein family UPF0240
NZ_NITZ01000005 Xenorhabdus miraniensis strain DSM17902	24933-25187	reverse	hypothetical protein	hypothetical	Uncharacterised protein family UPF0240
NZ_NITZ01000005 Xenorhabdus miraniensis strain DSM17902	25184-26137	reverse	DNA transposition protein B	DNA transposition protein	Mu B transposition protein, C terminal
NZ_NITZ01000005 Xenorhabdus miraniensis strain DSM17902	26146-28125	reverse	DNA transposition protein A	Mu transposase C-terminal domain-containing protein	Bacteriophage Mu transposase
NZ_NITZ01000005 Xenorhabdus miraniensis strain DSM17902	28165-28386	reverse	Ner	helix-turn-helix domain-containing protein	Winged helix-turn-helix DNA-binding
NZ_NITZ01000005 Xenorhabdus miraniensis strain DSM17902	28544-29188	forward	repressor	helix-turn-helix domain-containing protein	Helix-turn-helix
NZ_MKGR01000019 Xenorhabdus thuongxuanensis strain 30TX1	42869-43594	forward	ABC transporter	LPS export ABC transporter ATP-binding protein	ABC transporter
NZ_MKGR01000019 Xenorhabdus thuongxuanensis strain 30TX1	43664-45103	forward	hypothetical	RNA polymerase factor sigma-54	Sigma-54, DNA binding domain
NZ_MKGR01000019 Xenorhabdus thuongxuanensis strain 30TX1	45127-45429	forward	hypothetical protein	ribosome hibernation promoting factor HPF	Sigma 54 modulation protein / S30EA ribosomal protein
NZ_MKGR01000019 Xenorhabdus thuongxuanensis strain 30TX1	45595-46074	forward	hypothetical	nitrogen regulatory IIA protein	Phosphoenolpyruvate-dependent sugar phosphotransferase system, EIIA 2
NZ_MKGR01000019 Xenorhabdus thuongxuanensis strain 30TX1	46115-46966	forward	minor tail protein	RNase adapter RapZ	P-loop ATPase protein family
NZ_MKGR01000019 Xenorhabdus thuongxuanensis strain 30TX1	47044-47256	forward	hypothetical	PTS phosphocarrier protein NPr	PTS HPr component phosphorylation site
NZ_MKGR01000019 Xenorhabdus thuongxuanensis strain 30TX1	47231-47470	reverse	hypothetical protein	transposase	Putative transposase DNA-binding domain
NZ_MKGR01000019 Xenorhabdus thuongxuanensis strain 30TX1	47508-47690	forward	hypothetical	no hit	Uncharacterised protein
NZ_MKGR01000019 Xenorhabdus thuongxuanensis strain 30TX1	47991-48593	reverse	repressor	transcriptional regulator	Bacteriophage CI repressor helix-turn-helix domain
NZ_MKGR01000019 Xenorhabdus thuongxuanensis strain 30TX1	48703-48969	forward	Ner	helix-turn-helix domain-containing protein	Winged helix-turn-helix DNA-binding
NZ_MKGR01000019 Xenorhabdus thuongxuanensis strain 30TX1	48988-50970	forward	DNA transposition protein A	Mu transposase C-terminal domain-containing protein	Bacteriophage Mu transposase
NZ_MKGR01000019 Xenorhabdus thuongxuanensis strain 30TX1	50979-51932	forward	DNA transposition protein B	DNA transposition protein	Mu B transposition protein, C terminal
NZ_MKGR01000019 Xenorhabdus thuongxuanensis strain 30TX1	51929-52183	forward	hypothetical	hypothetical protein	Uncharacterised protein
NZ_MKGR01000019 Xenorhabdus thuongxuanensis strain 30TX1	52197-52400	forward	hypothetical	hypothetical protein	Uncharacterised protein
NZ_MKGR01000019 Xenorhabdus thuongxuanensis strain 30TX1	52434-53072	forward	gp05	DUF3164 family protein	Protein of unknown function (DUF3164)
NZ_MKGR01000019 Xenorhabdus thuongxuanensis strain 30TX1	53074-53307	forward	hypothetical protein	ANR family transcriptional regulator	Uncharacterised protein
NZ_MKGR01000019 Xenorhabdus thuongxuanensis strain 30TX1	53288-53476	forward	hypothetical	hypothetical protein	Uncharacterised protein
NZ_MKGR01000019 Xenorhabdus thuongxuanensis strain 30TX1	53496-53810	forward	hypothetical	hypothetical protein	Uncharacterised protein
NZ_MKGR01000019 Xenorhabdus thuongxuanensis strain 30TX1	53803-54030	forward	gp42	hypothetical protein	Protein of unknown function (DUF732)
NZ_MKGR01000019 Xenorhabdus thuongxuanensis strain 30TX1	54039-54572	forward	hypothetical protein	regulatory protein GemA	Protein of unknown function (DUF1018)
NZ_MKGR01000019 Xenorhabdus thuongxuanensis strain 30TX1	54569-55090	forward	hypothetical protein	hypothetical protein	Uncharacterised protein
NZ_MKGR01000019 Xenorhabdus thuongxuanensis strain 30TX1	55080-55397	forward	hypothetical	hypothetical protein	Uncharacterised protein
NZ_MKGR01000019 Xenorhabdus thuongxuanensis strain 30TX1	55410-55835	forward	late gene transcriptional activator	transcriptional regulator	Mor transcription activator family
NZ_MKGR01000019 Xenorhabdus thuongxuanensis strain 30TX1	55937-56449	forward	holin	N-acetylmuramidase	Glycosyl hydrolase 108
NZ_MKGR01000019 Xenorhabdus thuongxuanensis strain 30TX1	56449-56697	forward	hypothetical	hypothetical protein	Uncharacterised protein
NZ_MKGR01000019 Xenorhabdus thuongxuanensis strain 30TX1	56691-56921	forward	hypothetical	hypothetical protein	Uncharacterised protein
NZ_MKGR01000019 Xenorhabdus thuongxuanensis strain 30TX1	56918-57514	forward	hypothetical	hypothetical protein	Uncharacterised protein
NZ_MKGR01000019 Xenorhabdus thuongxuanensis strain 30TX1	57746-58018	forward	hypothetical protein	DUF2730 family protein	Protein of unknown function (DUF2730)
NZ_MKGR01000019 Xenorhabdus thuongxuanensis strain 30TX1	58018-58314	forward	hypothetical protein	hypothetical protein	Uncharacterised protein
NZ_MKGR01000019 Xenorhabdus thuongxuanensis strain 30TX1	58317-58889	forward	hypothetical protein	DUF3486 family protein	Protein of unknown function (DUF3486)
NZ_MKGR01000019 Xenorhabdus thuongxuanensis strain 30TX1	58889-60448	forward	hypothetical protein	terminase family protein	Terminase large subunit, N-terminal
NZ_MKGR01000019 Xenorhabdus thuongxuanensis strain 30TX1	60445-62016	forward	portal protein	Mu-like prophage FluMu protein gp29	Protein of unknown function (DUF935)
NZ_MKGR01000019 Xenorhabdus thuongxuanensis strain 30TX1	62000-63292	forward	virion morphogenesis	minor capsid protein	Phage Mu protein F like protein
NZ_MKGR01000019 Xenorhabdus thuongxuanensis strain 30TX1	63289-63759	forward	virion morphogenesis protein	phage virion morphogenesis protein	Phage virion morphogenesis family
NZ_MKGR01000019 Xenorhabdus thuongxuanensis strain 30TX1	63926-65140	forward	protease	phage protease	Mu-like prophage I protein
NZ_MKGR01000019 Xenorhabdus thuongxuanensis strain 30TX1	65140-66063	forward	major head protein	Mu-like prophage major head subunit gpT family protein	Mu-like prophage major head subunit gpT
NZ_MKGR01000019 Xenorhabdus thuongxuanensis strain 30TX1	66121-66447	forward	hypothetical	hypothetical protein	Mu-like prophage FluMu N-terminal domain
NZ_MKGR01000019 Xenorhabdus thuongxuanensis strain 30TX1	66444-66896	forward	hypothetical protein	DUF1320 family protein	Protein of unknown function (DUF1320)
NZ_MKGR01000019 Xenorhabdus thuongxuanensis strain 30TX1	66896-67447	forward	hypothetical protein	DUF1834 family protein	Domain of unknown function (DUF1834)
NZ_MKGR01000019 Xenorhabdus thuongxuanensis strain 30TX1	67440-67616	forward	hypothetical protein	DUF2635 domain-containing protein	Protein of unknown function (DUF2635)
NZ_MKGR01000019 Xenorhabdus thuongxuanensis strain 30TX1	67616-69088	forward	tail sheath protein	phage tail sheath subtilisin-like domain-containing protein	Phage tail sheath protein subtilisin-like domain
NZ_MKGR01000019 Xenorhabdus thuongxuanensis strain 30TX1	69103-69462	forward	tail tube protein	phage tail tube protein	Phage tail tube protein
NZ_MKGR01000019 Xenorhabdus thuongxuanensis strain 30TX1	69466-69819	forward	hypothetical protein	phage tail assembly protein	Phage tail assembly chaperone proteins, E, or 41 or 14
NZ_MKGR01000019 Xenorhabdus thuongxuanensis strain 30TX1	69821-69952	forward	hypothetical	conserved protein of unknown function	Uncharacterised protein
NZ_MKGR01000019 Xenorhabdus thuongxuanensis strain 30TX1	69952-72024	forward	phage tail tape measure protein	Phage tail tape-measure protein	Phage-related minor tail protein
NZ_MKGR01000019 Xenorhabdus thuongxuanensis strain 30TX1	72024-73508	forward	DNA circularization protein	DNA circularization N-terminal domain-containing protein	DNA circularisation protein N-terminus
NZ_MKGR01000019 Xenorhabdus thuongxuanensis strain 30TX1	73501-74592	forward	baseplate assembly protein	phage tail protein	Phage tail baseplate hub (GPD)
NZ_MKGR01000019 Xenorhabdus thuongxuanensis strain 30TX1	74589-75140	forward	baseplate assembly protein	phage baseplate assembly protein V	Bacteriophage Mu Gp45 spike protein
NZ_MKGR01000019 Xenorhabdus thuongxuanensis strain 30TX1	75137-75586	forward	hypothetical protein	phage GP46 family protein	Phage protein GP46
NZ_MKGR01000019 Xenorhabdus thuongxuanensis strain 30TX1	75587-76660	forward	hypothetical protein	baseplate J/gp47 family protein	Baseplate J-like protein
NZ_MKGR01000019 Xenorhabdus thuongxuanensis strain 30TX1	76657-77232	forward	hypothetical protein	DUF2313 domain-containing protein	Uncharacterised protein conserved in bacteria (DUF2313)
NZ_MKGR01000019 Xenorhabdus thuongxuanensis strain 30TX1	77242-77901	forward	tail fiber protein	tail fiber protein	Transcriptional regulator, AbiEi antitoxin, Type IV TA system
NZ_MKGR01000019 Xenorhabdus thuongxuanensis strain 30TX1	77888-78067	forward	hypothetical	hypothetical protein	Uncharacterised protein
NZ_MKGR01000019 Xenorhabdus thuongxuanensis strain 30TX1	78096-78266	reverse	tail fiber	tail fiber assembly protein	Caudovirales tail fibre assembly protein, lambda gpK
NZ_NJGH01000008 Xenorhabdus cabanillasii JM26	90321-90947	reverse	methyltransferase type 11	helix-turn-helix domain-containing protein	Bacteriophage CI repressor helix-turn-helix domain
NZ_NJGH01000008 Xenorhabdus cabanillasii JM26	91101-91331	forward	DNA binding protein Ner	helix-turn-helix domain-containing protein	Winged helix-turn-helix DNA-binding
NZ_NJGH01000008 Xenorhabdus cabanillasii JM26	91375-93354	forward	transposase	transposase	Bacteriophage Mu transposase
NZ_NJGH01000008 Xenorhabdus cabanillasii JM26	93363-94316	forward	DNA transposition protein	DNA transposition protein	Mu B transposition protein, C terminal
NZ_NJGH01000008 Xenorhabdus cabanillasii JM26	94313-94573	forward	hypothetical	hypothetical	Uncharacterised protein
NZ_NJGH01000008 Xenorhabdus cabanillasii JM26	94586-94789	forward	hypothetical	hypothetical	Uncharacterised protein
NZ_NJGH01000008 Xenorhabdus cabanillasii JM26	94779-95411	forward	gp05	DUF3164 family protein	Protein of unknown function (DUF3164)
NZ_NJGH01000008 Xenorhabdus cabanillasii JM26	95413-95646	forward	hypothetical	ANR family transcriptional regulator	Uncharacterised protein
NZ_NJGH01000008 Xenorhabdus cabanillasii JM26	95627-95815	forward	hypothetical	hypothetical	Uncharacterised protein
NZ_NJGH01000008 Xenorhabdus cabanillasii JM26	95898-96200	forward	hypothetical	hypothetical	Uncharacterised protein
NZ_NJGH01000008 Xenorhabdus cabanillasii JM26	96190-96450	forward	hypothetical	hypothetical	Uncharacterised protein
NZ_NJGH01000008 Xenorhabdus cabanillasii JM26	96440-96886	forward	hypothetical protein	hypothetical protein	Uncharacterised protein
NZ_NJGH01000008 Xenorhabdus cabanillasii JM26	96879-97103	forward	hypothetical protein	hypothetical protein	Uncharacterised protein
NZ_NJGH01000008 Xenorhabdus cabanillasii JM26	97112-97648	forward	hypothetical protein	regulatory protein GemA	Protein of unknown function (DUF1018)
NZ_NJGH01000008 Xenorhabdus cabanillasii JM26	97645-98151	forward	hypothetical protein	hypothetical protein	Uncharacterised protein
NZ_NJGH01000008 Xenorhabdus cabanillasii JM26	98152-98469	forward	hypothetical protein	hypothetical protein	Uncharacterised protein
NZ_NJGH01000008 Xenorhabdus cabanillasii JM26	98482-98907	forward	regulator of late transcription	transcriptional regulator	Mor transcription activator family
NZ_NJGH01000008 Xenorhabdus cabanillasii JM26	99007-99519	forward	holin	N-acetylmuramidase	Glycosyl hydrolase 108
NZ_NJGH01000008 Xenorhabdus cabanillasii JM26	99519-99776	forward	hypothetical	hypothetical	Uncharacterised protein
NZ_NJGH01000008 Xenorhabdus cabanillasii JM26	99760-99987	forward	hypothetical	hypothetical	Uncharacterised protein
NZ_NJGH01000008 Xenorhabdus cabanillasii JM26	99984-100583	forward	hypothetical	hypothetical	Uncharacterised protein
NZ_NJGH01000008 Xenorhabdus cabanillasii JM26	100580-100801	forward	C4-type zinc finger protein	Prokaryotic dksA/traR C4-type zinc finger	Prokaryotic dksA/traR C4-type zinc finger
NZ_NJGH01000008 Xenorhabdus cabanillasii JM26	100785-101087	forward	hypothetical protein	DUF2730 domain-containing protein	Protein of unknown function (DUF2730)
NZ_NJGH01000008 Xenorhabdus cabanillasii JM26	101087-101383	forward	hypothetical protein	hypothetical protein	Uncharacterised protein
NZ_NJGH01000008 Xenorhabdus cabanillasii JM26	101387-101959	forward	hypothetical protein	DUF3486 family protein	Protein of unknown function (DUF3486)
NZ_NJGH01000008 Xenorhabdus cabanillasii JM26	101959-103506	forward	hypothetical protein	terminase family protein	Terminase large subunit, T4likevirus-type, N-terminal
NZ_NJGH01000008 Xenorhabdus cabanillasii JM26	103503-105074	forward	portal protein	Mu-like prophage FluMu protein gp29	Protein of unknown function (DUF935)
NZ_NJGH01000008 Xenorhabdus cabanillasii JM26	105058-106350	forward	head morphogenesis protein	phage head morphogenesis protein/minor capsid protein	Phage Mu protein F like protein
NZ_NJGH01000008 Xenorhabdus cabanillasii JM26	106347-106817	forward	virion morphogenesis protein	phage virion morphogenesis protein	Phage virion morphogenesis family
NZ_NJGH01000008 Xenorhabdus cabanillasii JM26	106984-108201	forward	protease	phage protease	Mu-like prophage I protein
NZ_NJGH01000008 Xenorhabdus cabanillasii JM26	108201-109124	forward	major head subunit	Mu-like prophage major head subunit gpT family protein	Mu-like prophage major head subunit gpT
NZ_NJGH01000008 Xenorhabdus cabanillasii JM26	109184-109492	forward	hypothetical protein	Mu-like prophage FluMu protein gp35	Mu-like prophage FluMu N-terminal domain
NZ_NJGH01000008 Xenorhabdus cabanillasii JM26	109489-109941	forward	hypothetical protein	DUF1320 family protein	Protein of unknown function (DUF1320)
NZ_NJGH01000008 Xenorhabdus cabanillasii JM26	109941-110483	forward	hypothetical protein	DUF1834 family protein	Domain of unknown function (DUF1834)
NZ_NJGH01000008 Xenorhabdus cabanillasii JM26	110480-110656	forward	hypothetical protein	DUF2635 domain-containing protein	Protein of unknown function (DUF2635)
NZ_NJGH01000008 Xenorhabdus cabanillasii JM26	110656-112128	forward	tail sheath protein	phage tail sheath subtilisin-like domain-containing protein	Phage tail sheath protein subtilisin-like domain
NZ_NJGH01000008 Xenorhabdus cabanillasii JM26	112144-112503	forward	tail tube protein	phage tail tube protein	Phage tail tube protein
NZ_NJGH01000008 Xenorhabdus cabanillasii JM26	112505-112858	forward	hypothetical protein	phage tail assembly protein	Phage tail assembly chaperone proteins, E, or 41 or 14
NZ_NJGH01000008 Xenorhabdus cabanillasii JM26	112860-112994	forward	hypothetical	hypothetical protein	Uncharacterised protein
NZ_NJGH01000008 Xenorhabdus cabanillasii JM26	112991-114982	forward	phage tail tape measure protein	hypothetical protein	Phage-related minor tail protein
NZ_NJGH01000008 Xenorhabdus cabanillasii JM26	114982-116403	forward	DNA circulation protein	DNA circularization N-terminal domain-containing protein	DNA circularisation protein N-terminus
NZ_NJGH01000008 Xenorhabdus cabanillasii JM26	116396-117484	forward	tail protein	tail protein	Phage tail baseplate hub (GPD)
NZ_NJGH01000008 Xenorhabdus cabanillasii JM26	117481-118026	forward	baseplate assembly protein	phage baseplate assembly protein V	Bacteriophage Mu Gp45 spike protein
NZ_NJGH01000008 Xenorhabdus cabanillasii JM26	118023-118478	forward	hypothetical protein	phage GP46 family protein	Phage protein GP46
NZ_NJGH01000008 Xenorhabdus cabanillasii JM26	118479-119552	forward	baseplate J like protein	baseplate J/gp47 family protein	Baseplate J-like protein
NZ_NJGH01000008 Xenorhabdus cabanillasii JM26	119543-120124	forward	hypothetical protein	DUF2313 domain-containing protein	Uncharacterised protein conserved in bacteria (DUF2313)
