# Supplementary material for: Identification of novel prophage regions in Xenorhabdus nematophila genome and gene expression analysis during phage-like particle induction
Source: PeerJ. 2022 Feb 15;10:e12956. doi: 10.7717/peerj.12956 (PMC8855722; doi:10.7717/peerj.12956)
Supplement: Supplemental Information 5 — All the tests were performed in the R environment. For all the data, we tested if the data were normally distributed (Shapiro-Wilk normality test), present common variance (Levene’s test) and were independent group (Chi-squared test). These three assumptions were not validated, thus non-parametric Kruskal-wallis rank sum associated with multiple pairwise comparisons using the dunn’s test was used. [file peerj-10-12956-s005.xlsx]

## Sheet: Sheet1
gene	condition comparison	Shapiro-Wilk normality test			Levene's test			Chi-squared test			Kruskal-Wallis rank sum test (dunn test)
		W	p-value	normality	F value	Pr(>F)	Equal Variances	X-squared	p-value	Independence	chi-squared	p-value	significancy
recA	all	0.35033	1.92e-10	no	0.9466	0.5088	yes	586.32	2.2e-16	no	25.2228	0	*
	control vs mitomycin, 15 min										-1.62327	0.0523	no
	control vs mitomycin, 40 min										-2.27257	0.0115	*
	control vs mitomycin, 2hour										-2.4349	0.0074	*
	control vs mitomycin, 10hour										-1.64646	0.0498	.
	control vs UV, 2hour										-1.3218	0.0931	no
	control vs UV, 10hour										1.08991	0.1379	no
lexA	all	0.54801	1.792e-08	no	1.124	0.3912	yes	152.43	2.2e-16	no	22.4824	0.01	*
	control vs mitomycin, 15 min										-1.29861	0.097	no
	control vs mitomycin, 40 min										-2.17982	0.0146	*
	control vs mitomycin, 2hour										-2.11025	0.0174	*
	control vs mitomycin, 10hour										0.672496	0.2506	no
	control vs UV, 2hour										-1.22904	0.1095	no
	control vs UV, 10hour										1.3218	0.0931	no
CI repressor xnp1	all	0.47103	2.683e-09	no	0.8383	0.5906	yes	98.067	1.99e-09	no	6.9779	0.64	no
	control vs mitomycin, 15 min										0.417411	0.3382	no
	control vs mitomycin, 40 min										-1.43775	0.0753	no
	control vs mitomycin, 2hour										0.069568	0.4723	no
	control vs mitomycin, 10hour										-1.22904	0.1095	no
	control vs UV, 2hour										0.301463	0.3815	no
	control vs UV, 10hour										0.579738	0.281	no
GpA xnp1	all	0.33804	1.496e-10	no	1.1745	0.3619	yes	11023	2.2e-16	no	22.362	0.01	*
	control vs mitomycin, 15 min										-0.231895	0.4083	no
	control vs mitomycin, 40 min										-0.556548	0.2889	no
	control vs mitomycin, 2hour										-2.15663	0.0155	*
	control vs mitomycin, 10hour										-1.78559	0.0371	*
	control vs UV, 2hour										-1.97111	0.0244	*
	control vs UV, 10hour										1.3218	0.0931	no
GpW xnp1	all	0.34791	1.827e-10	no	1.5736	0.1904	yes	21288	2.2e-16	no	20.9423	0.01	*
	control vs mitomycin, 15 min										0.231895	0.4083	no
	control vs mitomycin, 40 min										-0.97396	0.165	no
	control vs mitomycin, 2hour										-2.34214	0.0096	*
	control vs mitomycin, 10hour										-2.34214	0.0096	*
	control vs UV, 2hour										-1.78559	0.0371	*
	control vs UV, 10hour										0.533359	0.2969	no
CI repressor xnp3	all	0.31853	1.014e-10	no	1.8827	0.1145	yes	1136.4	2.2e-16	no	18.5676	0.03	*
	control vs mitomycin, 15 min										0.139137	0.4447	no
	control vs mitomycin, 40 min										-0.881201	0.1891	no
	control vs mitomycin, 2hour										-0.48698	0.3131	no
	control vs mitomycin, 10hour										1.78559	0.0371	*
	control vs UV, 2hour										-1.69284	0.0452	*
	control vs UV, 10hour										1.60008	0.0548	no
major head xnp3	all	0.24398	2.451e-11	no	1.0251	0.454	yes	74322	2.2e-16	no	19.4323	0.02	*
	control vs mitomycin, 15 min										0.139137	0.4447	no
	control vs mitomycin, 40 min										-0.742064	0.229	no
	control vs mitomycin, 2hour										2.01749	0.0218	*
	control vs mitomycin, 10hour										-1.92473	0.0271	*
	control vs UV, 2hour										-2.01749	0.0218	*
	control vs UV, 10hour										0.48698	0.3131	no
tail fiber xnp4	all	0.3147	9.401e-11	no	1.2109	0.3419	yes	2080	2.2e-16	no	21.394	0.01	*
	control vs mitomycin, 15 min										0.046379	0.4815	no
	control vs mitomycin, 40 min										-0.649306	0.2581	no
	control vs mitomycin, 2hour										-2.4349	0.0074	*
	control vs mitomycin, 10hour										-1.64646	0.0498	.
	control vs UV, 2hour										-1.78559	0.0371	*
	control vs UV, 10hour										1.22904	0.1095	no
