# Supplementary material for: Identification of novel prophage regions in Xenorhabdus nematophila genome and gene expression analysis during phage-like particle induction
Source: PeerJ. 2022 Feb 15;10:e12956. doi: 10.7717/peerj.12956 (PMC8855722; doi:10.7717/peerj.12956)
Supplement: Supplemental Information 6 [file peerj-10-12956-s006.xlsx]

## Sheet: Sheet1
Experiment 1 : late after induction
condition	time (hour)	OD600
control	0	0.38
mitomycin	0	0.41
UV	0	0.41
control	2	1.18
mitomycin	2	1.23
UV	2	1
control	10	1.8
mitomycin	10	0.13
UV	10	1.16
Experiment 2 : early after induction
condition	time (minute)	OD600
control1	0	0.45
control2	0	0.45
control3	0	0.45
mitomycin1	0	0.45
mitomycin2	0	0.45
mitomycin3	0	0.45
control1	15	0.52
control2	15	0.54
control3	15	0.56
mitomycin1	15	0.52
mitomycin2	15	0.52
mitomycin3	15	0.52
control1	40	0.76
control2	40	0.76
control3	40	0.72
mitomycin1	40	0.8
mitomycin2	40	0.74
mitomycin3	40	0.74
