# Supplementary material for: Identification of novel prophage regions in Xenorhabdus nematophila genome and gene expression analysis during phage-like particle induction
Source: PeerJ. 2022 Feb 15;10:e12956. doi: 10.7717/peerj.12956 (PMC8855722; doi:10.7717/peerj.12956)
Supplement: Supplemental Information 7 [file peerj-10-12956-s007.xlsx]

## Sheet: Sheet1
Experiment: early after induction
gene	Name	condition	time after induction	sample	Ct SYBR
Xn_gyrA	0_1_15	control	15 minutes	1	26.49
	0_1_15	control	15 minutes	1	26.72
	0_1_15	control	15 minutes	1	27.33
	0_1_15	control	15 minutes	1	27.37
	0_2_15	control	15 minutes	2	25.44
	0_2_15	control	15 minutes	2	24.9
	0_2_15	control	15 minutes	2	25.03
	0_2_15	control	15 minutes	2	24.89
	0_3_15	control	15 minutes	3	26.63
	0_3_15	control	15 minutes	3	26.62
	0_3_15	control	15 minutes	3	26.55
	0_3_15	control	15 minutes	3	26.76
	0_21_40	control	40 minutes	2.1	25.51
	0_21_40	control	40 minutes	2.1	25.46
	0_21_40	control	40 minutes	2.1	24.83
	0_21_40	control	40 minutes	2.1	25.65
	0_22_40	control	40 minutes	2.2	24.58
	0_22_40	control	40 minutes	2.2	24.54
	0_22_40	control	40 minutes	2.2	24.56
	0_22_40	control	40 minutes	2.2	24.12
	0_3_40	control	40 minutes	3	26.78
	0_3_40	control	40 minutes	3	26.84
	0_3_40	control	40 minutes	3	26.46
	0_3_40	control	40 minutes	3	26.5
	M_1_15	mitomycin	15 minutes	1	25.99
	M_1_15	mitomycin	15 minutes	1	25.95
	M_1_15	mitomycin	15 minutes	1	25.84
	M_1_15	mitomycin	15 minutes	1	25.55
	M_2_15	mitomycin	15 minutes	2	27.61
	M_2_15	mitomycin	15 minutes	2	27.66
	M_2_15	mitomycin	15 minutes	2	27.75
	M_2_15	mitomycin	15 minutes	2	27.85
	M_3_15	mitomycin	15 minutes	3	25.94
	M_3_15	mitomycin	15 minutes	3	25.51
	M_3_15	mitomycin	15 minutes	3	25.69
	M_3_15	mitomycin	15 minutes	3	25.88
	M_21_40	mitomycin	40 minutes	2.1	27.93
	M_21_40	mitomycin	40 minutes	2.1	27.31
	M_21_40	mitomycin	40 minutes	2.1	27.44
	M_21_40	mitomycin	40 minutes	2.1	27.09
	M_22_40	mitomycin	40 minutes	2.2	25.46
	M_22_40	mitomycin	40 minutes	2.2	25.62
	M_22_40	mitomycin	40 minutes	2.2	25.54
	M_22_40	mitomycin	40 minutes	2.2	25.62
	M_3_40	mitomycin	40 minutes	3	26.03
	M_3_40	mitomycin	40 minutes	3	25.79
	M_3_40	mitomycin	40 minutes	3	25.89
	M_3_40	mitomycin	40 minutes	3	25.92
Xn_recA	0_1_15	control	15 minutes	1	20.82
	0_1_15	control	15 minutes	1	20.82
	0_2_15	control	15 minutes	2	19.02
	0_2_15	control	15 minutes	2	18.84
	0_3_15	control	15 minutes	3	20.16
	0_3_15	control	15 minutes	3	19.97
	0_21_40	control	40 minutes	2.1	19.26
	0_21_40	control	40 minutes	2.1	19.11
	0_22_40	control	40 minutes	2.2	18.58
	0_22_40	control	40 minutes	2.2	18.53
	0_3_40	control	40 minutes	3	19.49
	0_3_40	control	40 minutes	3	19.39
	M_1_15	mitomycin	15 minutes	1	18.23
	M_1_15	mitomycin	15 minutes	1	18.03
	M_2_15	mitomycin	15 minutes	2	19.76
	M_2_15	mitomycin	15 minutes	2	19.76
	M_3_15	mitomycin	15 minutes	3	16.92
	M_3_15	mitomycin	15 minutes	3	17.34
	M_21_40	mitomycin	40 minutes	2.1	18.14
	M_21_40	mitomycin	40 minutes	2.1	18.06
	M_22_40	mitomycin	40 minutes	2.2	16.54
	M_22_40	mitomycin	40 minutes	2.2	16.06
	M_3_40	mitomycin	40 minutes	3	18.45
	M_3_40	mitomycin	40 minutes	3	18.32
Xn_lexA	0_1_15	control	15 minutes	1	20.86
	0_1_15	control	15 minutes	1	20.66
	0_2_15	control	15 minutes	2	19.19
	0_2_15	control	15 minutes	2	18.74
	0_3_15	control	15 minutes	3	20.56
	0_3_15	control	15 minutes	3	20.39
	0_21_40	control	40 minutes	2.1	19.91
	0_21_40	control	40 minutes	2.1	19.67
	0_22_40	control	40 minutes	2.2	19.54
	0_22_40	control	40 minutes	2.2	19.56
	0_3_40	control	40 minutes	3	20.94
	0_3_40	control	40 minutes	3	20.85
	M_1_15	mitomycin	15 minutes	1	18
	M_1_15	mitomycin	15 minutes	1	17.97
	M_2_15	mitomycin	15 minutes	2	20.14
	M_2_15	mitomycin	15 minutes	2	19.9
	M_3_15	mitomycin	15 minutes	3	17.98
	M_3_15	mitomycin	15 minutes	3	18.1
	M_21_40	mitomycin	40 minutes	2.1	19.06
	M_21_40	mitomycin	40 minutes	2.1	19.23
	M_22_40	mitomycin	40 minutes	2.2	17.05
	M_22_40	mitomycin	40 minutes	2.2	16.79
	M_3_40	mitomycin	40 minutes	3	18.33
	M_3_40	mitomycin	40 minutes	3	18.46
Xn_CI_xnp1	0_1_15	control	15 minutes	1	22.33
	0_1_15	control	15 minutes	1	22.38
	0_2_15	control	15 minutes	2	20.14
	0_2_15	control	15 minutes	2	20.41
	0_3_15	control	15 minutes	3	21.96
	0_3_15	control	15 minutes	3	22.04
	0_21_40	control	40 minutes	2.1	21.4
	0_21_40	control	40 minutes	2.1	21.56
	0_22_40	control	40 minutes	2.2	21.2
	0_22_40	control	40 minutes	2.2	21.15
	0_3_40	control	40 minutes	3	22.2
	0_3_40	control	40 minutes	3	22.67
	M_1_15	mitomycin	15 minutes	1	20.75
	M_1_15	mitomycin	15 minutes	1	20.52
	M_2_15	mitomycin	15 minutes	2	22.98
	M_2_15	mitomycin	15 minutes	2	22.97
	M_3_15	mitomycin	15 minutes	3	22.2
	M_3_15	mitomycin	15 minutes	3	22.19
	M_21_40	mitomycin	40 minutes	2.1	23.23
	M_21_40	mitomycin	40 minutes	2.1	23.34
	M_22_40	mitomycin	40 minutes	2.2	21.72
	M_22_40	mitomycin	40 minutes	2.2	21.69
	M_3_40	mitomycin	40 minutes	3	21.36
	M_3_40	mitomycin	40 minutes	3	21.37
Xn_gpa_xnp1	0_1_15	control	15 minutes	1	28.81
	0_1_15	control	15 minutes	1	28.04
	0_2_15	control	15 minutes	2	26.69
	0_2_15	control	15 minutes	2	26.64
	0_3_15	control	15 minutes	3	28.73
	0_3_15	control	15 minutes	3	27.26
	0_21_40	control	40 minutes	2.1	27.6
	0_21_40	control	40 minutes	2.1	27.41
	0_22_40	control	40 minutes	2.2	26.8
	0_22_40	control	40 minutes	2.2	26.98
	0_3_40	control	40 minutes	3	27.94
	0_3_40	control	40 minutes	3	28.35
	M_1_15	mitomycin	15 minutes	1	26.14
	M_1_15	mitomycin	15 minutes	1	27.35
	M_2_15	mitomycin	15 minutes	2	28.7
	M_2_15	mitomycin	15 minutes	2	29.18
	M_3_15	mitomycin	15 minutes	3	20.31
	M_3_15	mitomycin	15 minutes	3	20.35
	M_21_40	mitomycin	40 minutes	2.1	21.49
	M_21_40	mitomycin	40 minutes	2.1	19.49
	M_22_40	mitomycin	40 minutes	2.2	21.51
	M_22_40	mitomycin	40 minutes	2.2	21.43
	M_3_40	mitomycin	40 minutes	3	28.15
	M_3_40	mitomycin	40 minutes	3	27.94
Xn_GpW_xnp1	0_1_15	control	15 minutes	1	25.74
	0_1_15	control	15 minutes	1	25.96
	0_2_15	control	15 minutes	2	24.18
	0_2_15	control	15 minutes	2	24.56
	0_3_15	control	15 minutes	3	24.69
	0_3_15	control	15 minutes	3	24.47
	0_21_40	control	40 minutes	2.1	24.79
	0_21_40	control	40 minutes	2.1	25.28
	0_22_40	control	40 minutes	2.2	24.83
	0_22_40	control	40 minutes	2.2	24.3
	0_3_40	control	40 minutes	3	26.88
	0_3_40	control	40 minutes	3	25.94
	M_1_15	mitomycin	15 minutes	1	24.19
	M_1_15	mitomycin	15 minutes	1	23.82
	M_2_15	mitomycin	15 minutes	2	26.12
	M_2_15	mitomycin	15 minutes	2	25.93
	M_3_15	mitomycin	15 minutes	3	21.52
	M_3_15	mitomycin	15 minutes	3	21.62
	M_21_40	mitomycin	40 minutes	2.1	22.66
	M_21_40	mitomycin	40 minutes	2.1	22.91
	M_22_40	mitomycin	40 minutes	2.2	21.6
	M_22_40	mitomycin	40 minutes	2.2	21.14
	M_3_40	mitomycin	40 minutes	3	24.69
	M_3_40	mitomycin	40 minutes	3	24.45
Xn_mh_xnp3	0_1_15	control	15 minutes	1	30.8
	0_1_15	control	15 minutes	1	30.97
	0_2_15	control	15 minutes	2	30.77
	0_2_15	control	15 minutes	2	29.42
	0_3_15	control	15 minutes	3	29.49
	0_3_15	control	15 minutes	3	30.33
	0_21_40	control	40 minutes	2.1	32.39
	0_21_40	control	40 minutes	2.1	34.95
	0_22_40	control	40 minutes	2.2	31.62
	0_22_40	control	40 minutes	2.2	32.3
	0_3_40	control	40 minutes	3	33.7
	0_3_40	control	40 minutes	3	33.34
	M_1_15	mitomycin	15 minutes	1	31.96
	M_1_15	mitomycin	15 minutes	1	30.77
	M_2_15	mitomycin	15 minutes	2	32.14
	M_2_15	mitomycin	15 minutes	2	31.6
	M_3_15	mitomycin	15 minutes	3	32
	M_3_15	mitomycin	15 minutes	3	31.25
	M_21_40	mitomycin	40 minutes	2.1	34.27
	M_21_40	mitomycin	40 minutes	2.1	33.28
	M_22_40	mitomycin	40 minutes	2.2	28.39
	M_22_40	mitomycin	40 minutes	2.2	29.76
	M_3_40	mitomycin	40 minutes	3	32.62
	M_3_40	mitomycin	40 minutes	3	33.87
Xn_CI_xnp3	0_1_15	control	15 minutes	1	23.04
	0_1_15	control	15 minutes	1	23.13
	0_2_15	control	15 minutes	2	21.93
	0_2_15	control	15 minutes	2	22.54
	0_3_15	control	15 minutes	3	22.13
	0_3_15	control	15 minutes	3	22.12
	0_21_40	control	40 minutes	2.1	22.28
	0_21_40	control	40 minutes	2.1	21.98
	0_22_40	control	40 minutes	2.2	21.83
	0_22_40	control	40 minutes	2.2	22.27
	0_3_40	control	40 minutes	3	23.17
	0_3_40	control	40 minutes	3	24.22
	M_1_15	mitomycin	15 minutes	1	21.44
	M_1_15	mitomycin	15 minutes	1	21.42
	M_2_15	mitomycin	15 minutes	2	23.58
	M_2_15	mitomycin	15 minutes	2	23.41
	M_3_15	mitomycin	15 minutes	3	23.17
	M_3_15	mitomycin	15 minutes	3	23.24
	M_21_40	mitomycin	40 minutes	2.1	23.78
	M_21_40	mitomycin	40 minutes	2.1	24.03
	M_22_40	mitomycin	40 minutes	2.2	22.86
	M_22_40	mitomycin	40 minutes	2.2	23.12
	M_3_40	mitomycin	40 minutes	3	21.95
	M_3_40	mitomycin	40 minutes	3	22.06
Xn_tf_xnp4	0_1_15	control	15 minutes	1	26.31
	0_1_15	control	15 minutes	1	25.62
	0_2_15	control	15 minutes	2	24.5
	0_2_15	control	15 minutes	2	24.75
	0_3_15	control	15 minutes	3	25.48
	0_3_15	control	15 minutes	3	25.49
	0_21_40	control	40 minutes	2.1	24.15
	0_21_40	control	40 minutes	2.1	24.06
	0_22_40	control	40 minutes	2.2	22.95
	0_22_40	control	40 minutes	2.2	23.42
	0_3_40	control	40 minutes	3	25.24
	0_3_40	control	40 minutes	3	25.38
	M_1_15	mitomycin	15 minutes	1	24.49
	M_1_15	mitomycin	15 minutes	1	24.55
	M_2_15	mitomycin	15 minutes	2	26.22
	M_2_15	mitomycin	15 minutes	2	26.44
	M_3_15	mitomycin	15 minutes	3	24.87
	M_3_15	mitomycin	15 minutes	3	24.87
	M_21_40	mitomycin	40 minutes	2.1	25.48
	M_21_40	mitomycin	40 minutes	2.1	26.12
	M_22_40	mitomycin	40 minutes	2.2	24.52
	M_22_40	mitomycin	40 minutes	2.2	23.93
	M_3_40	mitomycin	40 minutes	3	24.96
	M_3_40	mitomycin	40 minutes	3	25.16
Experiment: late after induction
gene	Name	condition	time after induction	sample	Ct SYBR
Xn_gyrA	0YRT1	control	2 hours	A	25.8
	0YRT1	control	2 hours	A	25.81
	0YRT1	control	2 hours	A	26.37
	0YRT1	control	2 hours	A	25.93
	0YRT1_B	control	2 hours	B	26.69
	0YRT1_B	control	2 hours	B	26.79
	0YRT1_B	control	2 hours	B	25.31
	0YRT1_B	control	2 hours	B	25.16
	0YRT1_C	control	2 hours	C	24.71
	0YRT1_C	control	2 hours	C	25.05
	0YRT1_C	control	2 hours	C	24.67
	0YRT1_C	control	2 hours	C	24.98
	0YRT2C	control	10 hours	C	27.28
	0YRT2C	control	10 hours	C	27.01
	0YRT2D	control	10 hours	D	25.67
	0YRT2D	control	10 hours	D	25.87
	0YRT2E	control	10 hours	E	26.23
	0YRT2E	control	10 hours	E	26.11
	0YRT2E	control	10 hours	E	25.47
	0YRT2E	control	10 hours	E	25.51
	5YRT1	mitomycin	2 hours	A	32.43
	5YRT1	mitomycin	2 hours	A	32.18
	5YRT1	mitomycin	2 hours	A	36.96
	5YRT1	mitomycin	2 hours	A	35.26
	5YRT1_B	mitomycin	2 hours	B	31.51
	5YRT1_B	mitomycin	2 hours	B	31.33
	5YRT1_B	mitomycin	2 hours	B	29.41
	5YRT1_B	mitomycin	2 hours	B	29.07
	5YRT1_C	mitomycin	2 hours	C	32.08
	5YRT1_C	mitomycin	2 hours	C	31.03
	5YRT1_C	mitomycin	2 hours	C	29.14
	5YRT1_C	mitomycin	2 hours	C	29.09
	5YRT2A	mitomycin	10 hours	A	35.64
	5YRT2A	mitomycin	10 hours	A	36.44
	5YRT2A	mitomycin	10 hours	A	34.04
	5YRT2B	mitomycin	10 hours	B	33.03
	5YRT2B	mitomycin	10 hours	B	33.6
	5YRT2C	mitomycin	10 hours	C	34.66
	5YRT2C	mitomycin	10 hours	C	34.18
	5YRT2C	mitomycin	10 hours	C	34.13
	5YRT2C	mitomycin	10 hours	C	34.33
	UVYRT1	UV	2 hours	A	31.6
	UVYRT1	UV	2 hours	A	31.53
	UYRT1_B	UV	2 hours	B	31.61
	UYRT1_B	UV	2 hours	B	31.72
	UYRT1_B	UV	2 hours	B	30.06
	UYRT1_B	UV	2 hours	B	29.42
	UYRT1_C	UV	2 hours	C	31.34
	UYRT1_C	UV	2 hours	C	30.71
	UYRT1_C	UV	2 hours	C	29.42
	UYRT1_C	UV	2 hours	C	29.1
	UVYRT2A	UV	10 hours	A	26.25
	UVYRT2A	UV	10 hours	A	25.26
	UVYRT2B	UV	10 hours	B	26.3
	UVYRT2B	UV	10 hours	B	26.53
	UYRT2C	UV	10 hours	C	24.78
	UYRT2C	UV	10 hours	C	24.64
	UYRT2C	UV	10 hours	C	24.59
	UYRT2C	UV	10 hours	C	24.4
Xn_recA	0YRT1	control	2 hours	A	19.22
	0YRT1	control	2 hours	A	18.8
	0YRT1_B	control	2 hours	B	18.4
	0YRT1_B	control	2 hours	B	18.68
	0YRT1_C	control	2 hours	C	18.33
	0YRT1_C	control	2 hours	C	18.09
	0YRT2C	control	10 hours	C	20.27
	0YRT2C	control	10 hours	C	20.09
	0YRT2D	control	10 hours	D	18.24
	0YRT2D	control	10 hours	D	18
	0YRT2E	control	10 hours	E	19.67
	0YRT2E	control	10 hours	E	19.91
	5YRT1	mitomycin	2 hours	A	21.84
	5YRT1	mitomycin	2 hours	A	21.62
	5YRT1_B	mitomycin	2 hours	B	20.78
	5YRT1_B	mitomycin	2 hours	B	20.66
	5YRT1_C	mitomycin	2 hours	C	20.72
	5YRT1_C	mitomycin	2 hours	C	20.58
	5YRT2A	mitomycin	10 hours	A	25.78
	5YRT2A	mitomycin	10 hours	A	25.7
	5YRT2B	mitomycin	10 hours	B	25.94
	5YRT2B	mitomycin	10 hours	B	25.17
	5YRT2C	mitomycin	10 hours	C	26.37
	5YRT2C	mitomycin	10 hours	C	26.53
	UVYRT1	UV	2 hours	A	22.84
	UVYRT1	UV	2 hours	A	22.7
	UYRT1_B	UV	2 hours	B	22.62
	UYRT1_B	UV	2 hours	B	22.66
	UYRT1_C	UV	2 hours	C	22.4
	UYRT1_C	UV	2 hours	C	22.22
	UVYRT2A	UV	10 hours	A	20.31
	UVYRT2A	UV	10 hours	A	20.17
	UVYRT2B	UV	10 hours	B	20.69
	UVYRT2B	UV	10 hours	B	20.36
	UYRT2C	UV	10 hours	C	19.67
	UYRT2C	UV	10 hours	C	19.76
Xn_lexA	0YRT1	control	2 hours	A	20.65
	0YRT1	control	2 hours	A	21.4
	0YRT1_B	control	2 hours	B	19.46
	0YRT1_B	control	2 hours	B	19.42
	0YRT1_C	control	2 hours	C	19.61
	0YRT1_C	control	2 hours	C	19.24
	0YRT2C	control	10 hours	C	18.31
	0YRT2C	control	10 hours	C	18.25
	0YRT2D	control	10 hours	D	21.1
	0YRT2D	control	10 hours	D	20.32
	0YRT2E	control	10 hours	E	19.81
	0YRT2E	control	10 hours	E	19.62
	5YRT1	mitomycin	2 hours	A	25.67
	5YRT1	mitomycin	2 hours	A	25.47
	5YRT1_B	mitomycin	2 hours	B	23.14
	5YRT1_B	mitomycin	2 hours	B	23.18
	5YRT1_C	mitomycin	2 hours	C	22.08
	5YRT1_C	mitomycin	2 hours	C	22.75
	5YRT2A	mitomycin	10 hours	A	29.75
	5YRT2A	mitomycin	10 hours	A	29.88
	5YRT2B	mitomycin	10 hours	B	29.23
	5YRT2B	mitomycin	10 hours	B	29.43
	5YRT2C	mitomycin	10 hours	C	29.35
	5YRT2C	mitomycin	10 hours	C	29.35
	UVYRT1	UV	2 hours	A	25.08
	UVYRT1	UV	2 hours	A	26.15
	UYRT1_B	UV	2 hours	B	24.06
	UYRT1_B	UV	2 hours	B	24.13
	UYRT1_C	UV	2 hours	C	24.15
	UYRT1_C	UV	2 hours	C	23.92
	UVYRT2A	UV	10 hours	A	20.84
	UVYRT2A	UV	10 hours	A	21.34
	UVYRT2B	UV	10 hours	B	20.55
	UVYRT2B	UV	10 hours	B	20.55
	UYRT2C	UV	10 hours	C	18.89
	UYRT2C	UV	10 hours	C	19.09
Xn_CI_xnp1	0YRT1	control	2 hours	A	23.46
	0YRT1	control	2 hours	A	23.52
	0YRT1_B	control	2 hours	B	22.55
	0YRT1_B	control	2 hours	B	22.65
	0YRT1_C	control	2 hours	C	22.49
	0YRT1_C	control	2 hours	C	22.36
	0YRT2C	control	10 hours	C	23.3
	0YRT2C	control	10 hours	C	23.3
	0YRT2D	control	10 hours	D	22.14
	0YRT2D	control	10 hours	D	21.85
	0YRT2E	control	10 hours	E	22.54
	0YRT2E	control	10 hours	E	22.39
	5YRT1	mitomycin	2 hours	A	27.26
	5YRT1	mitomycin	2 hours	A	28.64
	5YRT1_B	mitomycin	2 hours	B	28.59
	5YRT1_B	mitomycin	2 hours	B	28.33
	5YRT1_C	mitomycin	2 hours	C	27.91
	5YRT1_C	mitomycin	2 hours	C	27.55
	5YRT2A	mitomycin	10 hours	A	29.91
	5YRT2A	mitomycin	10 hours	A	29.46
	5YRT2B	mitomycin	10 hours	B	30.05
	5YRT2B	mitomycin	10 hours	B	29.93
	5YRT2C	mitomycin	10 hours	C	30.1
	5YRT2C	mitomycin	10 hours	C	30.17
	UVYRT1	UV	2 hours	A	28.62
	UVYRT1	UV	2 hours	A	28.44
	UYRT1_B	UV	2 hours	B	28.67
	UYRT1_B	UV	2 hours	B	27.12
	UYRT1_C	UV	2 hours	C	29.95
	UYRT1_C	UV	2 hours	C	29.97
	UVYRT2A	UV	10 hours	A	22.71
	UVYRT2A	UV	10 hours	A	22.06
	UVYRT2B	UV	10 hours	B	22.5
	UVYRT2B	UV	10 hours	B	22.67
	UYRT2C	UV	10 hours	C	21.78
	UYRT2C	UV	10 hours	C	21.73
Xn_Gpa_xnp1	0YRT1	control	2 hours	A	26.29
	0YRT1	control	2 hours	A	25.34
	0YRT1_B	control	2 hours	B	25.16
	0YRT1_B	control	2 hours	B	24.84
	0YRT1_C	control	2 hours	C	25.34
	0YRT1_C	control	2 hours	C	24.66
	0YRT2C	control	10 hours	C	22.6
	0YRT2C	control	10 hours	C	22.77
	0YRT2D	control	10 hours	D	24.99
	0YRT2D	control	10 hours	D	25.02
	0YRT2E	control	10 hours	E	23.09
	0YRT2E	control	10 hours	E	23.29
	5YRT1	mitomycin	2 hours	A	24.19
	5YRT1	mitomycin	2 hours	A	24.28
	5YRT1_B	mitomycin	2 hours	B	23.25
	5YRT1_B	mitomycin	2 hours	B	23.01
	5YRT1_C	mitomycin	2 hours	C	24.68
	5YRT1_C	mitomycin	2 hours	C	24.97
	5YRT2A	mitomycin	10 hours	A	28.52
	5YRT2A	mitomycin	10 hours	A	28.17
	5YRT2B	mitomycin	10 hours	B	28.67
	5YRT2B	mitomycin	10 hours	B	28.36
	5YRT2C	mitomycin	10 hours	C	24.9
	5YRT2C	mitomycin	10 hours	C	24.27
	UVYRT1	UV	2 hours	A	25.36
	UVYRT1	UV	2 hours	A	25.23
	UYRT1_B	UV	2 hours	B	23.16
	UYRT1_B	UV	2 hours	B	22.91
	UYRT1_C	UV	2 hours	C	24.99
	UYRT1_C	UV	2 hours	C	24.95
	UVYRT2A	UV	10 hours	A	24.77
	UVYRT2A	UV	10 hours	A	24.94
	UVYRT2B	UV	10 hours	B	24.61
	UVYRT2B	UV	10 hours	B	24.63
	UYRT2C	UV	10 hours	C	25.4
	UYRT2C	UV	10 hours	C	25.49
Xn_gpW_xnp1	0YRT1	control	2 hours	A	22.74
	0YRT1	control	2 hours	A	22.9
	0YRT1_B	control	2 hours	B	22.1
	0YRT1_B	control	2 hours	B	22.07
	0YRT1_C	control	2 hours	C	21.45
	0YRT1_C	control	2 hours	C	21.75
	0YRT2C	control	10 hours	C	22.71
	0YRT2C	control	10 hours	C	22.7
	0YRT2D	control	10 hours	D	22.85
	0YRT2D	control	10 hours	D	23.06
	0YRT2E	control	10 hours	E	18.46
	0YRT2E	control	10 hours	E	18.26
	5YRT1	mitomycin	2 hours	A	20.59
	5YRT1	mitomycin	2 hours	A	20.51
	5YRT1_B	mitomycin	2 hours	B	18.36
	5YRT1_B	mitomycin	2 hours	B	18.21
	5YRT1_C	mitomycin	2 hours	C	20.66
	5YRT1_C	mitomycin	2 hours	C	20.69
	5YRT2A	mitomycin	10 hours	A	23.16
	5YRT2A	mitomycin	10 hours	A	22.62
	5YRT2B	mitomycin	10 hours	B	22.94
	5YRT2B	mitomycin	10 hours	B	22.87
	5YRT2C	mitomycin	10 hours	C	20.15
	5YRT2C	mitomycin	10 hours	C	20.38
	UVYRT1	UV	2 hours	A	21.95
	UVYRT1	UV	2 hours	A	22.04
	UYRT1_B	UV	2 hours	B	23.68
	UYRT1_B	UV	2 hours	B	22.44
	UYRT1_C	UV	2 hours	C	22.86
	UYRT1_C	UV	2 hours	C	21.3
	UVYRT2A	UV	10 hours	A	22.57
	UVYRT2A	UV	10 hours	A	22.27
	UVYRT2B	UV	10 hours	B	22.68
	UVYRT2B	UV	10 hours	B	22.71
	UYRT2C	UV	10 hours	C	22.07
	UYRT2C	UV	10 hours	C	22.62
Xn_mh_xnp3	0YRT1	control	2 hours	A	30.27
	0YRT1	control	2 hours	A	29.44
	0YRT1_B	control	2 hours	B	29.45
	0YRT1_B	control	2 hours	B	29.21
	0YRT1_C	control	2 hours	C	29.92
	0YRT1_C	control	2 hours	C	29.86
	0YRT2C	control	10 hours	C	24.81
	0YRT2C	control	10 hours	C	24.87
	0YRT2D	control	10 hours	D	23.76
	0YRT2D	control	10 hours	D	23.61
	0YRT2E	control	10 hours	E	30.31
	0YRT2E	control	10 hours	E	29.89
	5YRT1	mitomycin	2 hours	A	28.34
	5YRT1	mitomycin	2 hours	A	30.33
	5YRT1_B	mitomycin	2 hours	B	28.89
	5YRT1_B	mitomycin	2 hours	B	28.89
	5YRT1_C	mitomycin	2 hours	C	29.89
	5YRT1_C	mitomycin	2 hours	C	29.12
	5YRT2A	mitomycin	10 hours	A	24.58
	5YRT2A	mitomycin	10 hours	A	24.75
	5YRT2B	mitomycin	10 hours	B	23.7
	5YRT2B	mitomycin	10 hours	B	24.04
	5YRT2C	mitomycin	10 hours	C	29.97
	5YRT2C	mitomycin	10 hours	C	29.97
	UVYRT1	UV	2 hours	A	27.93
	UVYRT1	UV	2 hours	A	29.34
	UYRT1_B	UV	2 hours	B	21.53
	UYRT1_B	UV	2 hours	B	21.21
	UYRT1_C	UV	2 hours	C	32.22
	UYRT1_C	UV	2 hours	C	31.88
	UVYRT2A	UV	10 hours	A	31.55
	UVYRT2A	UV	10 hours	A	31.55
	UVYRT2B	UV	10 hours	B	31.88
	UVYRT2B	UV	10 hours	B	31.27
	UYRT2C	UV	10 hours	C	25.32
	UYRT2C	UV	10 hours	C	25.61
Xn_CI_xnp3	0YRT1	control	2 hours	A	23.77
	0YRT1	control	2 hours	A	23.89
	0YRT1_B	control	2 hours	B	22.33
	0YRT1_B	control	2 hours	B	22.27
	0YRT1_C	control	2 hours	C	21.96
	0YRT1_C	control	2 hours	C	21.8
	0YRT2C	control	10 hours	C	20.35
	0YRT2C	control	10 hours	C	20.43
	0YRT2D	control	10 hours	D	21.52
	0YRT2D	control	10 hours	D	21.09
	0YRT2E	control	10 hours	E	21.78
	0YRT2E	control	10 hours	E	22.31
	5YRT1	mitomycin	2 hours	A	28.88
	5YRT1	mitomycin	2 hours	A	29.41
	5YRT1_B	mitomycin	2 hours	B	26.96
	5YRT1_B	mitomycin	2 hours	B	26.51
	5YRT1_C	mitomycin	2 hours	C	27.35
	5YRT1_C	mitomycin	2 hours	C	26.65
	5YRT2A	mitomycin	10 hours	A	33.42
	5YRT2A	mitomycin	10 hours	A	32.57
	5YRT2B	mitomycin	10 hours	B	32.81
	5YRT2B	mitomycin	10 hours	B	32.28
	5YRT2C	mitomycin	10 hours	C	32.6
	5YRT2C	mitomycin	10 hours	C	32.33
	UVYRT1	UV	2 hours	A	29.05
	UVYRT1	UV	2 hours	A	28.76
	UYRT1_B	UV	2 hours	B	21.08
	UYRT1_B	UV	2 hours	B	20.85
	UYRT1_C	UV	2 hours	C	22.69
	UYRT1_C	UV	2 hours	C	22.41
	UVYRT2A	UV	10 hours	A	23.99
	UVYRT2A	UV	10 hours	A	23.63
	UVYRT2B	UV	10 hours	B	23.57
	UVYRT2B	UV	10 hours	B	23.74
	UYRT2C	UV	10 hours	C	22.07
	UYRT2C	UV	10 hours	C	22.61
Xn_ft_xnp4	0YRT1	control	2 hours	A	23.36
	0YRT1	control	2 hours	A	24.7
	0YRT1_B	control	2 hours	B	22.98
	0YRT1_B	control	2 hours	B	23.2
	0YRT1_C	control	2 hours	C	23.73
	0YRT1_C	control	2 hours	C	23.77
	0YRT2C	control	10 hours	C	23.61
	0YRT2C	control	10 hours	C	23.14
	0YRT2D	control	10 hours	D	22.69
	0YRT2D	control	10 hours	D	22.43
	0YRT2E	control	10 hours	E	24.18
	0YRT2E	control	10 hours	E	23.99
	5YRT1	mitomycin	2 hours	A	25.3
	5YRT1	mitomycin	2 hours	A	25.92
	5YRT1_B	mitomycin	2 hours	B	23.91
	5YRT1_B	mitomycin	2 hours	B	24.31
	5YRT1_C	mitomycin	2 hours	C	23.52
	5YRT1_C	mitomycin	2 hours	C	23.25
	5YRT2A	mitomycin	10 hours	A	30.49
	5YRT2A	mitomycin	10 hours	A	30.59
	5YRT2B	mitomycin	10 hours	B	29.67
	5YRT2B	mitomycin	10 hours	B	30.23
	5YRT2C	mitomycin	10 hours	C	32.14
	5YRT2C	mitomycin	10 hours	C	32.51
	UVYRT1	UV	2 hours	A	26.95
	UVYRT1	UV	2 hours	A	27.03
	UYRT1_B	UV	2 hours	B	26.11
	UYRT1_B	UV	2 hours	B	26.15
	UYRT1_C	UV	2 hours	C	27.67
	UYRT1_C	UV	2 hours	C	27.35
	UVYRT2A	UV	10 hours	A	23.8
	UVYRT2A	UV	10 hours	A	23.63
	UVYRT2B	UV	10 hours	B	23.59
	UVYRT2B	UV	10 hours	B	23.59
	UYRT2C	UV	10 hours	C	24.43
	UYRT2C	UV	10 hours	C	24.43
